# Supplementary material for: MOF nanoparticles as heterogeneous catalysts for direct amide bond formations
Source: Royal Society of Chemistry journal article supplement (doi:10.1039/d2dt00369d), 2022-01-01
Supplement: d2dt00369d1.pdf [file d2dt00369d1.pdf]

# Supporting Information

## Ultra-small Zr-MOF nanoparticles as heterogeneous catalysts for direct amide bond formations

Isabel Abanadés Lázaro<sup>a\*</sup>, Ross S. Forgan<sup>b</sup> and Francisco. G. Cirujano<sup>a\*</sup>

<sup>a</sup> Instituto de Ciencia Molecular (ICMol), Universitat de Valencia, Catedrático José Beltrán Martínez nº 2, 46980 Paterna, Valencia, Spain

<sup>b</sup> WestCHEM School of Chemistry, University of Glasgow, Joseph Black Building, University Avenue, Glasgow G12 8QQ, UK

\*Correspondence: isabel.abanades@uv.es; francisco.c.garcia@uv.es

### Table of Contents

|                                                               |    |
|---------------------------------------------------------------|----|
| S1. General Experimental Remarks.....                         | 2  |
| S.2. Materials and Synthesis.....                             | 2  |
| S.3. Characterisation.....                                    | 4  |
| S.3.1 PXRD patterns.....                                      | 4  |
| S.3.2 Particle size.....                                      | 8  |
| S.3.3 Dynamic Light Adsorption measurements.....              | 16 |
| S.3.4 N <sub>2</sub> adsorption and desorption isotherms..... | 20 |
| S.3.5 FT-IR.....                                              | 26 |
| S.3.6 <sup>1</sup> H-NMR data.....                            | 28 |
| S.3.7 Thermogravimetric Analysis.....                         | 29 |
| S.4 Catalytic activity.....                                   | 33 |
| S.5. References.....                                          | 53 |

## S1. General Experimental Remarks

Powder X-Ray Diffraction (PXRD): PXRD patterns were collected in a PANalytical X'Pert PRO diffractometer using copper radiation ( $\text{Cu K}\alpha = 1.5418 \text{ \AA}$ ) with an X'Celerator detector, operating at 40 mA and 45 kV. Profiles were collected in the  $3^\circ < 2\theta < 40^\circ$  range with a step size of  $0.017^\circ$ . (University of Valencia)

Thermogravimetric Analysis (TGA): were carried out with a Mettler Toledo TGA/SDTA 851 apparatus between 25 and 800 °C under ambient conditions ( $10 \text{ }^\circ\text{C}\cdot\text{min}^{-1}$  scan rate and an air flow of  $9 \text{ mL}\cdot\text{min}^{-1}$ ). (University of Valencia)

Nuclear Magnetic Resonance Spectroscopy (NMR): NMR spectra were recorded on either a Bruker AVIII 300 MHz spectrometer and referenced to residual solvent peaks. (University of Valencia)

Gas Uptake:  $\text{N}_2$  adsorption isotherms were carried out at 77 K on a Quantachrome Autosorb iQ gas sorption analyser. Samples were degassed under vacuum at 120 °C for 20 hours using the internal turbo pump. BET surface areas were calculated from the isotherms using the Micropore BET Assistant in the Quantachrome ASiQwin operating software. (University of Glasgow)

Scanning Electron Microscopy (SEM) and single point energy-dispersive X-Ray analysis (EDX): particle morphologies, dimensions and mapping were studied with a Hitachi S-4800 scanning electron microscope at an accelerating voltage of 20 kV. No coating was performed. Particle size distribution was analysed manually using ImageJ software and calculated from a minimum of 50 nanoparticles. (University of Valencia)

Fourier Transform Infrared Spectroscopy: IR spectra of solids were collected using a Shimadzu Fourier Transform Infrared Spectrometer, FTIR-8400S, fitted with a Diamond ATR unit. (University of Valencia)

For the quantification of the reaction yield, we have focused on the following H-NMR spectroscopic signals of reagents and products. Aniline  $^1\text{H}$  NMR (300 MHz,  $\text{DMSO-}d_6$ )  $\delta$  7.06 – 6.98 (m, 2H), 6.66 – 6.48 (m, 3H). Formanilidine  $^1\text{H}$  NMR (300 MHz,  $\text{DMSO}$ )  $\delta$  8.26 (t,  $J = 2.1 \text{ Hz}$ , 1H), 7.58 (dt,  $J = 8.7, 1.7 \text{ Hz}$ , 2H), 7.35 – 7.26 (m, 3H). In the case of *N*-benzyl-2-phenylacetamide, the signal at ca. 3.6 (s, 2H) was used to quantify the yield, based on the remaining reagent characterized by the signal at ca. 3.5 (s, 2H).

## S.2. Materials and Synthesis

All reagents unless otherwise stated were obtained from commercial sources and were used without further purification.

**Synthesis of ultra-small particles**: In separate vials, zirconyl chloride octahydrate (213 mg, 0.66 mmol, 1 equivalent) and the linker (1.65 mmol, 2.5 equivalents) were dissolved in 20 mL of DMF. After mixing both precursor solutions in 80 mL pyrex jars, acetic acid (12 mmol, 18.2 equivalents) was added to the reaction mixture which, after gently stirring, was placed in the oven at 120 °C for 24 h. After cooling to room temperature, the powders were collected by centrifugation, and washed with DMF (X2) and MeOH (X3) through dispersion centrifugation cycles. The resultant NMOFs were dried under vacuum for at least 24 hours prior to analysis.

**Synthesis of standard Zr-BDC-NH<sub>2</sub>**: 2-aminoterephthalic acid (bdc- NH<sub>2</sub>) (122 mg, 0.675 mmol) was dissolved in 7.5 mL of DMF, and 0.9 mL of acetic acid (6% volume) was added to the solution. In a separate vial, the metal precursor, zirconium chloride (157 mg, 0.675 mmol) was dissolved in 7.5 mL of DMF. The solutions were mixed together in a 25 mL jar, which was placed in an oven and heated to 120 °C for 24 hours.

**<sup>1</sup>H NMR characterization:** approximately 5 mg of MOF were digested in 0.6 mL of DMSO-*d*<sub>6</sub> with 5 drops of D<sub>2</sub>SO<sub>4</sub> by heating at 75 °C and stirring until complete dissolution.

**Activation:** The precipitate was collected by centrifugation and washed with DMF (X2) and MeOH (X3)

**Catalytic test:** Product A: 100 μL of aniline (1.1 mmol) and 200 μL of formic acid (5.3 mmol) were added to a glass vial containing 10 mg of MOF and the mixture was heating at 35 °C under stirring at 300 rpm. Sample aliquots were taken at different times, diluted with DMSO-*d*<sub>6</sub> and analyzed by <sup>1</sup>H-NMR spectroscopy. The larger peak areas corresponding to the three protons of the aromatic ring of the aniline reagent and formamidine product were employed for the calculation of the yield, in order to minimize the error. Product B: 20 mg of phenyl acetic acid (0.15 mmol) and 20 μL of benzylamine (0.19 mmol) were dissolved in 200 μL of CD<sub>3</sub>OD and added to a vial containing 10 mg of MOF. The mixture was heated at 60 °C for 24 h. Sample aliquots were taken at different times, diluted with CD<sub>3</sub>OD and analyzed by <sup>1</sup>H-NMR spectroscopy.

**Catalyst recyclability:** For the recycling test, the spent MOF was thoroughly washed with ethanol and acetone and recovered by centrifugation. The dry MOF sample (30 mg MOF Zr-BDC-NH<sub>2</sub>) was tested in two subsequent reaction cycles between 200 μL aniline and 400 μL formic, 35 °C during a reaction time of 30 min.

### S.3. Characterisation

#### S.3.1. PXRD patterns

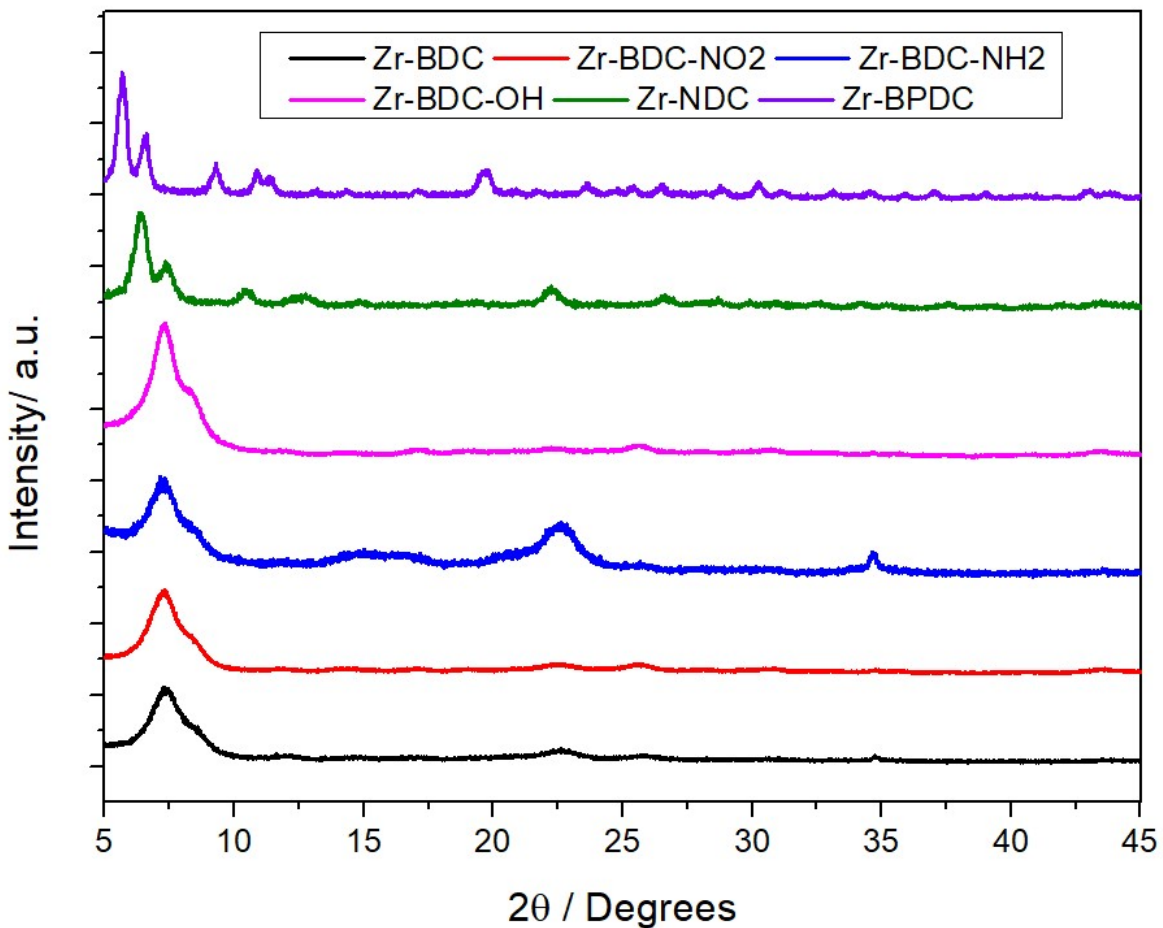

**Figure S1:** PXRD patterns of ultra-small Zr MOFs synthesized with different linkers, showing the UiO fcu topology.

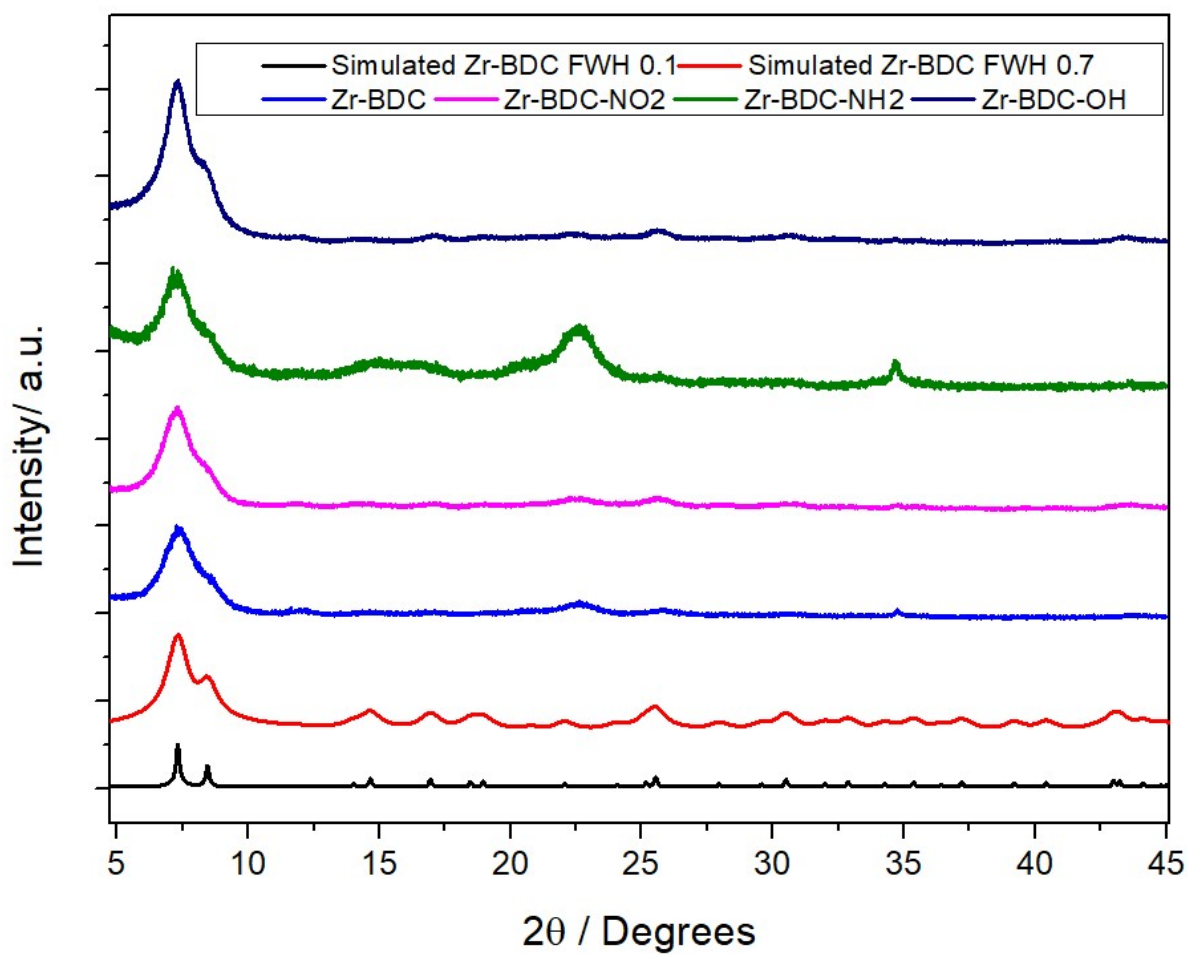

**Figure S2:** PXRD patterns of ultra-small Zr MOFs synthesized with BDC linkers compared with the simulated patterns with different Bragg reflection bands width. The wider Bragg reflections are a consequence of the small particle size of the samples, and as shown by the comparison with simulated patterns, the resolution of the spectra decreases with the peak width.

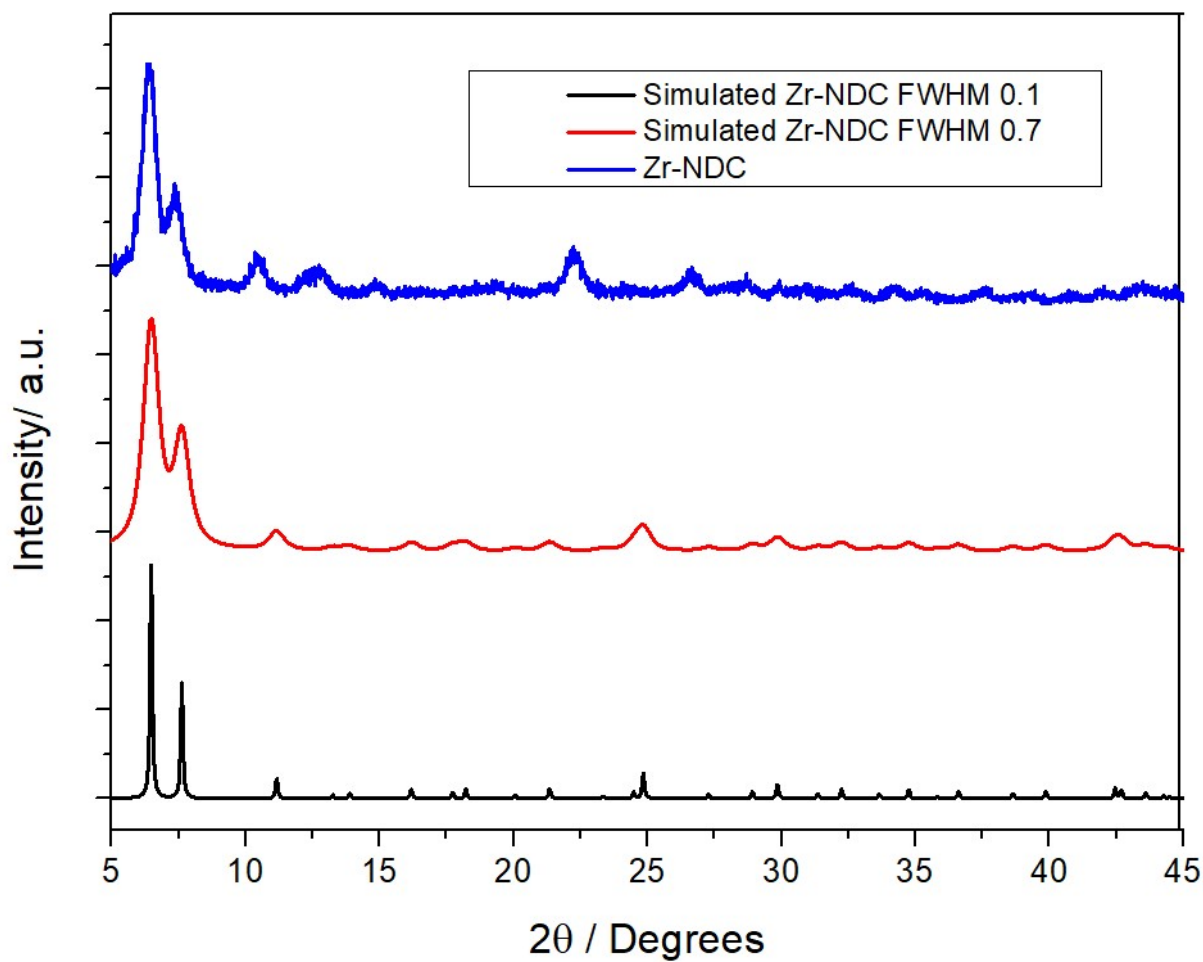

**Figure S3:** PXRD patterns of the ultra-small Zr-NDC MOF compared with the simulated patterns with different Bragg reflection bands width. The wider Bragg reflections are a consequence of the small particle size of the samples, and as shown by the comparison with simulated patterns, the resolution of the spectra decreases with the peak width.

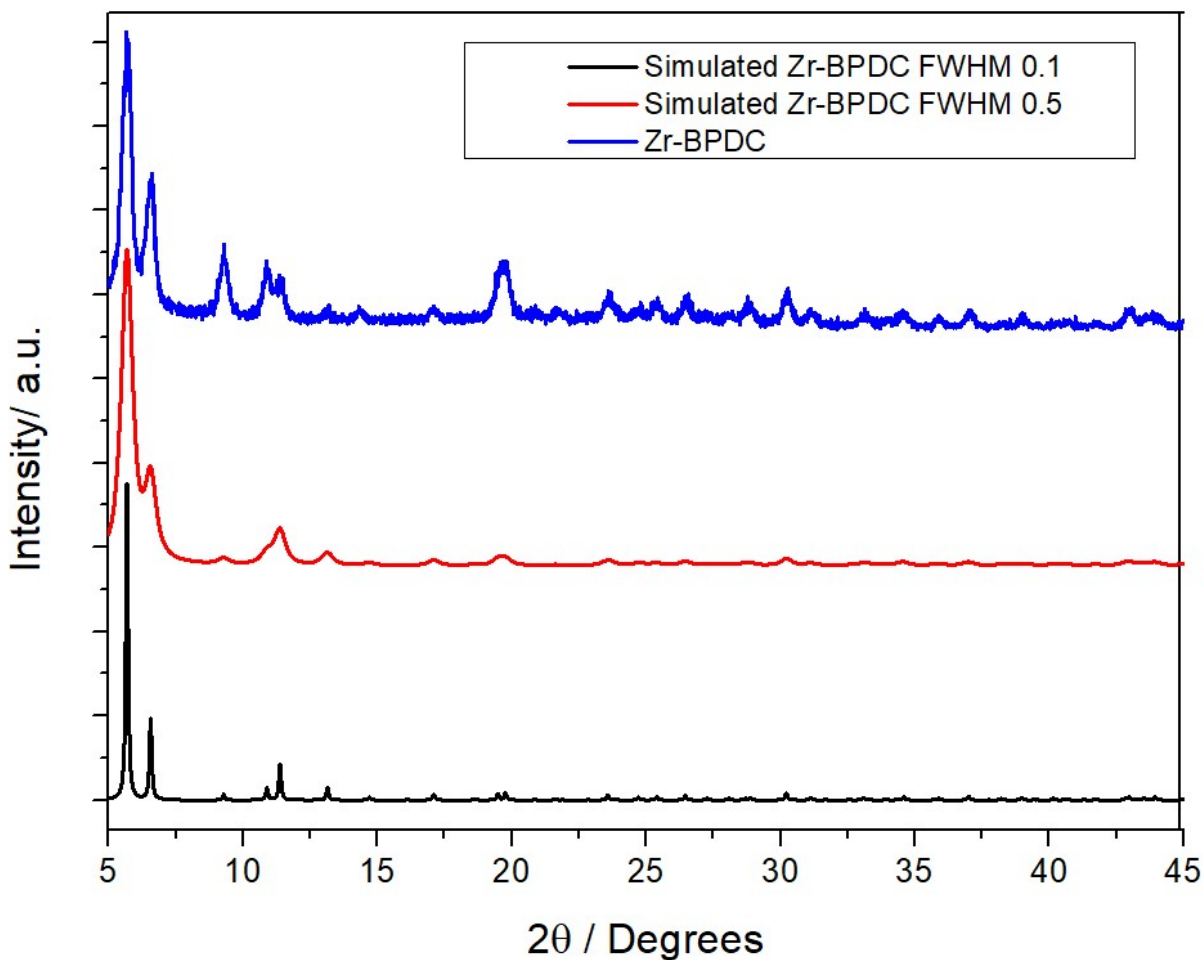

**Figure S4:** PXRD patterns of the ultra-small Zr-BPDC MOF compared with the simulated patterns with different Bragg reflection bands width. The wider Bragg reflections are a consequence of the small particle size of the samples, and as shown by the comparison with simulated patterns, the resolution of the spectra decreases with the peak width.

### S.3.2. Particle size

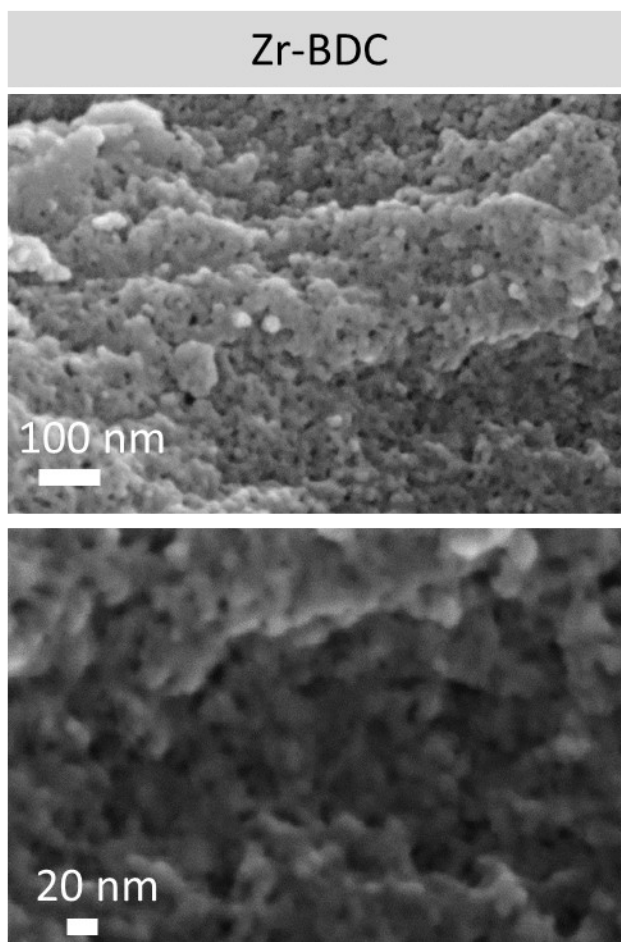

**Figure S5:** SEM images of ultra-small Zr-BDC.



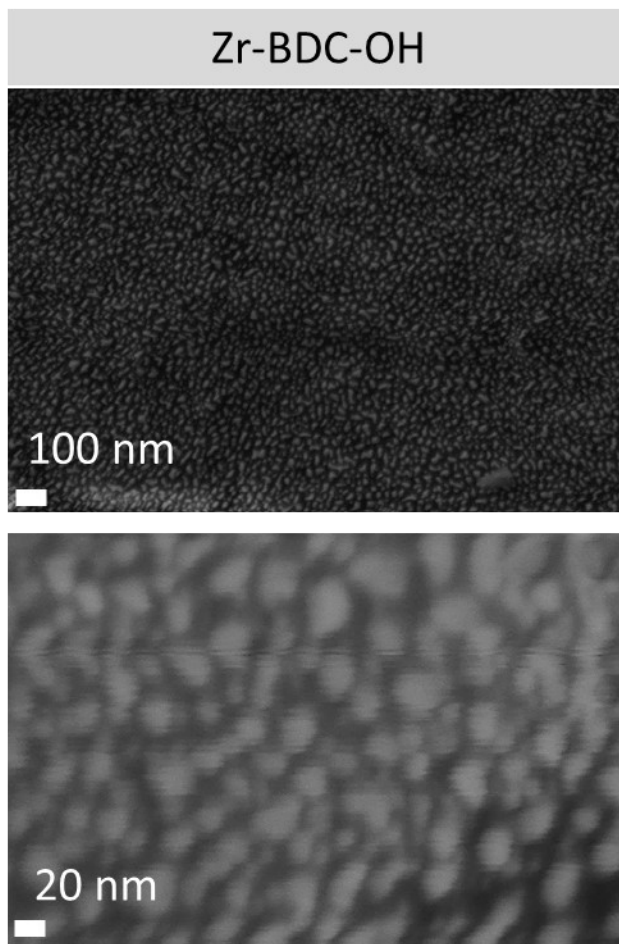

**Figure S6:** SEM images of ultra-small Zr-BDC-OH.

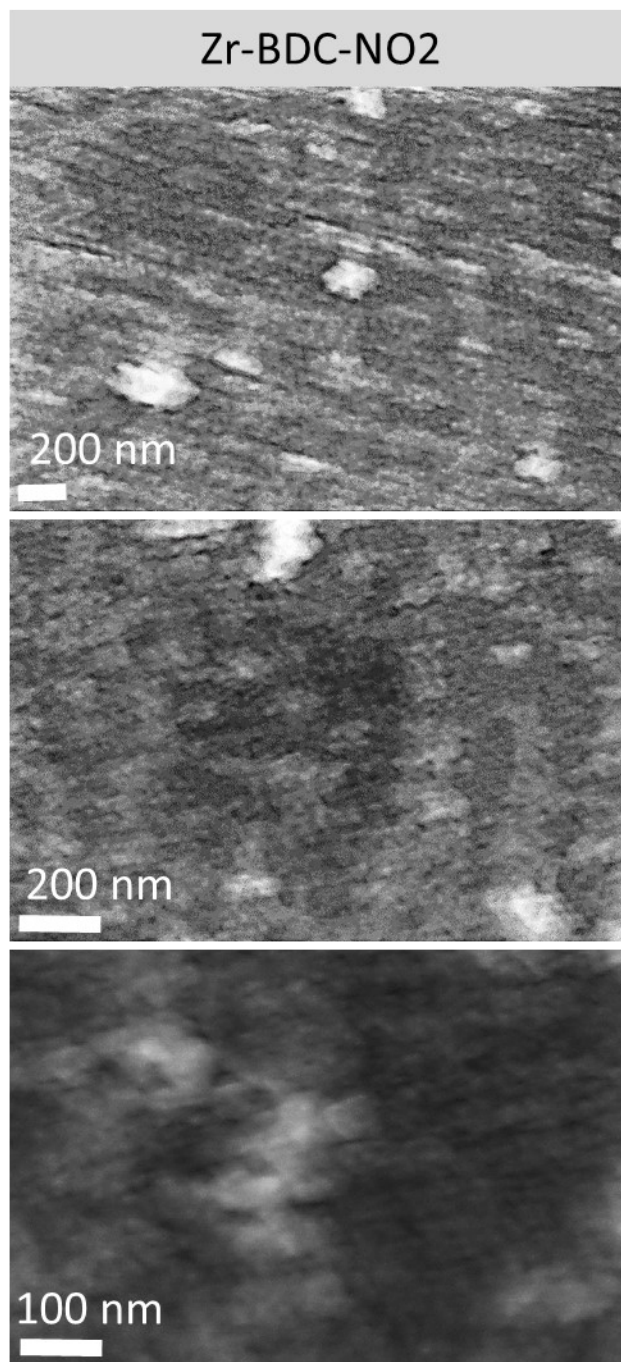

**Figure S7:** SEM images of ultra-small Zr-BDC-NO<sub>2</sub>.

Zr-BDC-NH<sub>2</sub>

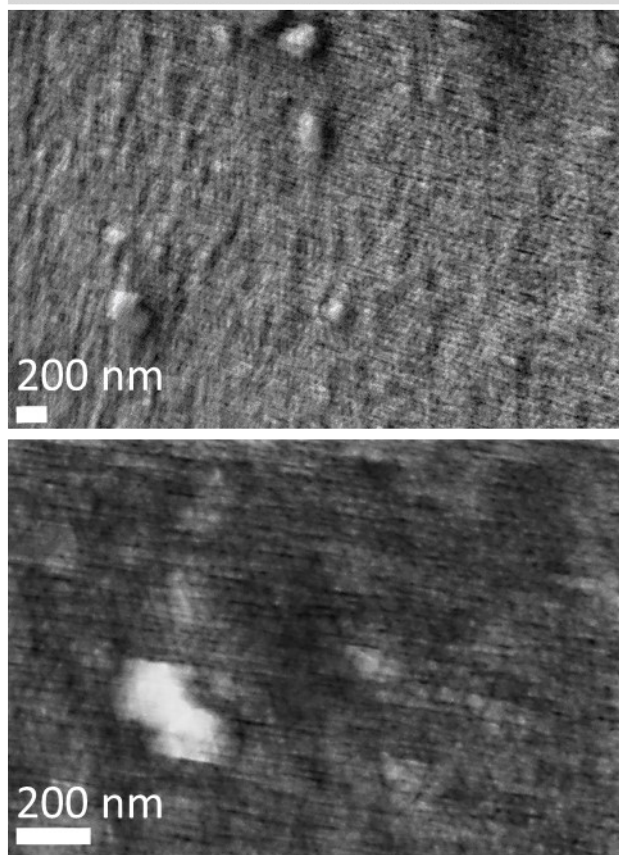

**Figure S8:** SEM images of ultra-small Zr-BDC-NH<sub>2</sub>.

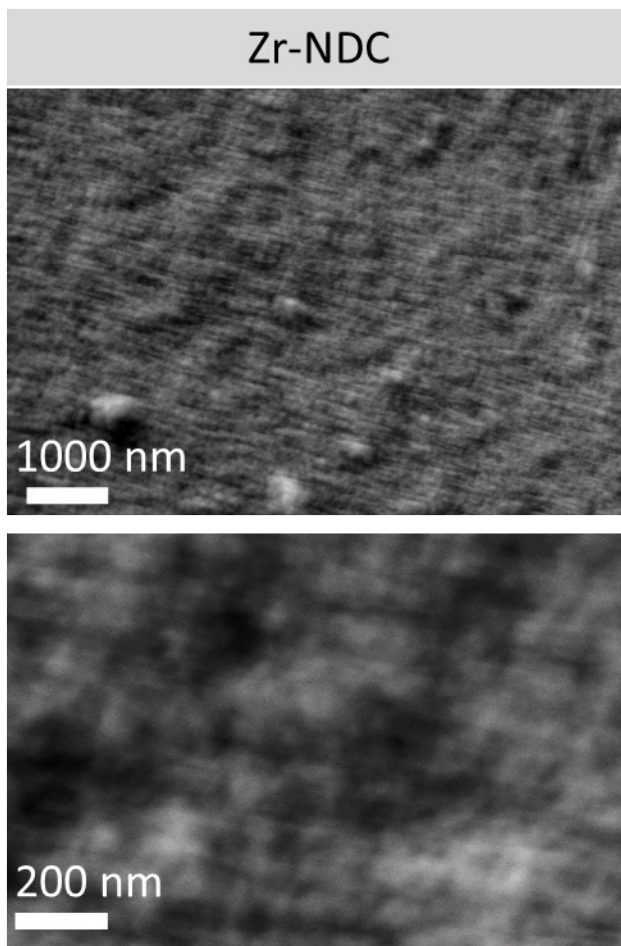

**Figure S9:** SEM images of ultra-small Zr-NDC.

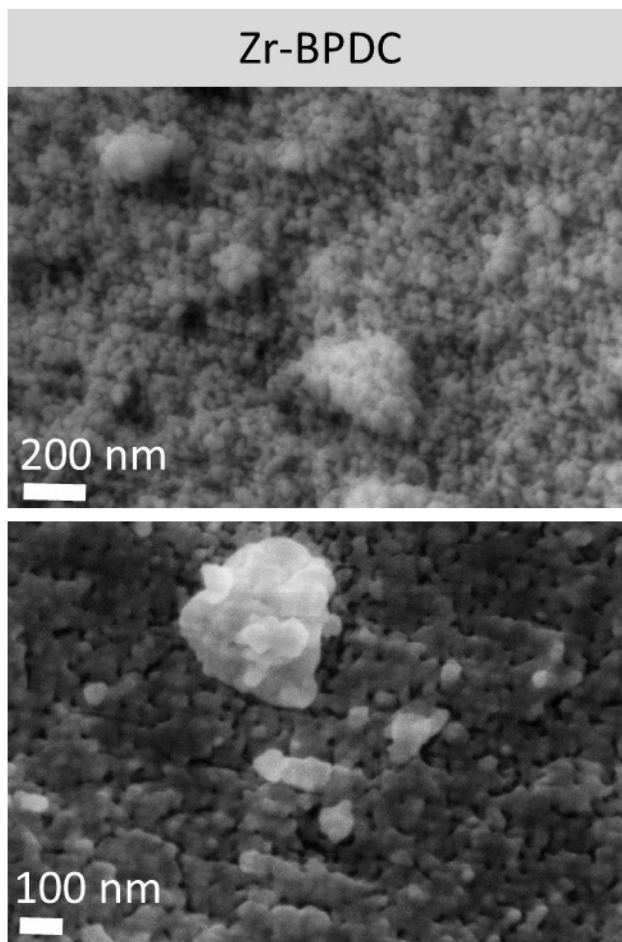

**Figure S10:** SEM images of ultra-small Zr-BPDC.

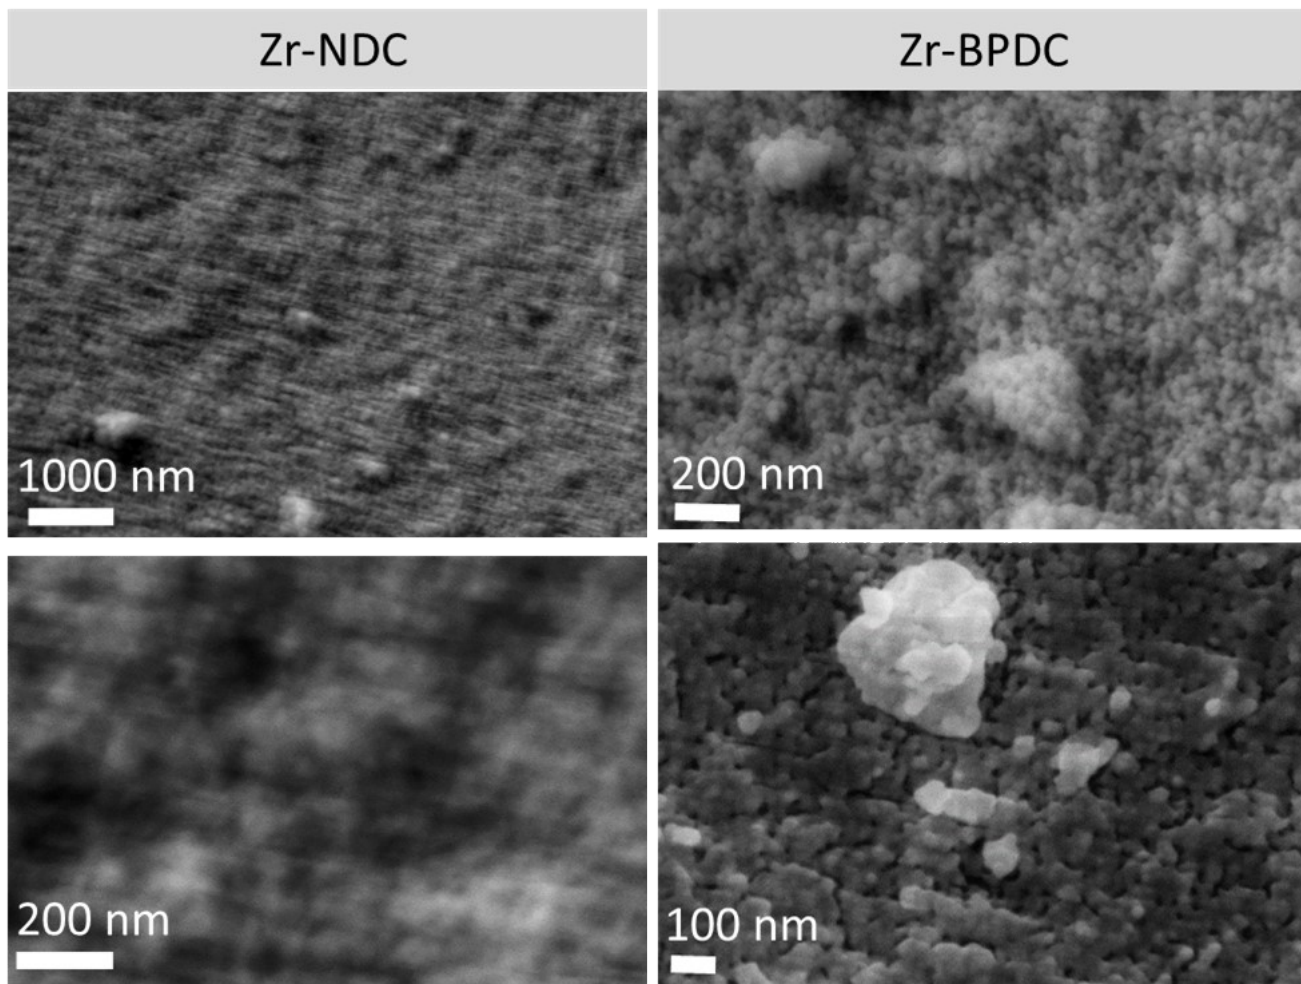

**Figure S11:** SEM images of ultra-small Zr- MOFs with extended linkers.

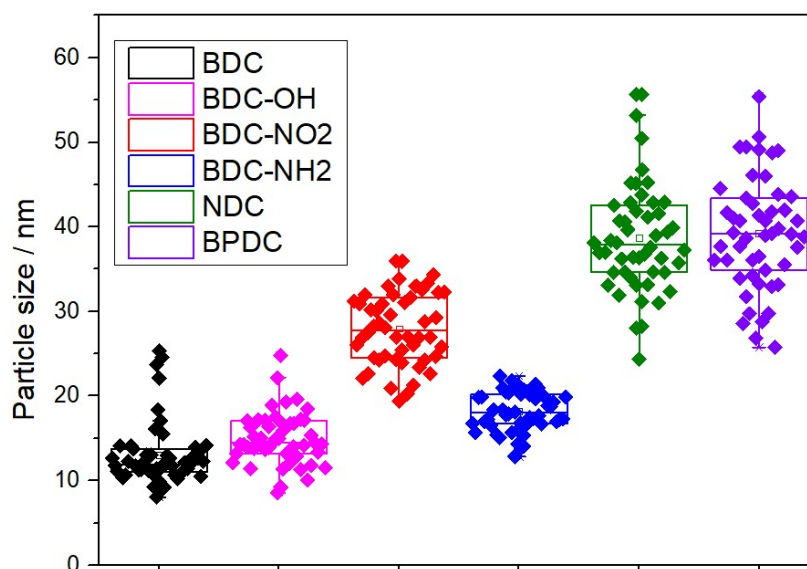

**Figure S12:** Box chart representation of ultra-small Zr-MOFs particle sizes. Bin size of 5 nm. Average size and standard deviation, 25% and 75% quartiles.

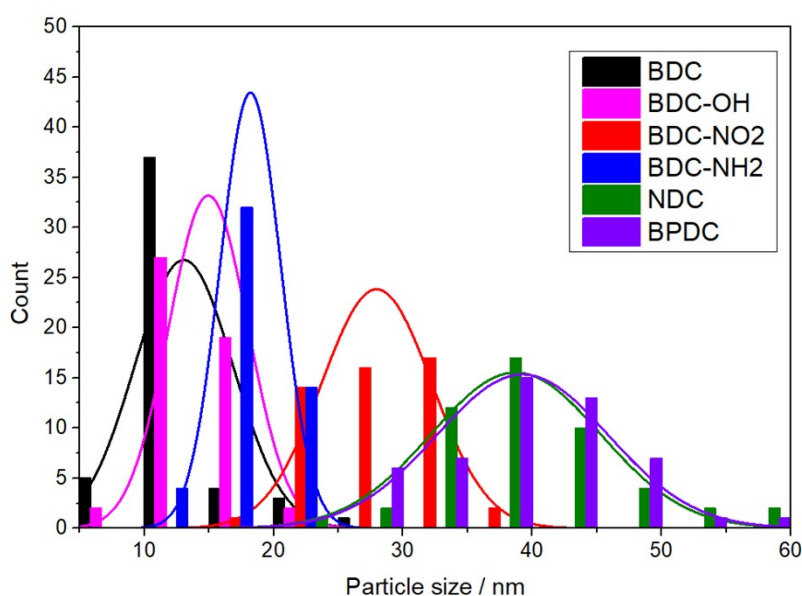

**Figure S13:** Histograms of ultra-small Zr-MOFs particle sizes together with particle size distribution curve. Bin size of 5 nm.

**Table S1:** Tabulated particle sizes and standard deviations of ultra-small Zr-MOFs. Units are given in nanometers.

| SAMPLE                       | Zr-BDC | Zr-BDC-OH | Zr-BDC-NO <sub>2</sub> | Zr-BDC-NH <sub>2</sub> | Zr-NDC | Zr-BPDC |
|------------------------------|--------|-----------|------------------------|------------------------|--------|---------|
| <b>Average particle size</b> | 13.04  | 14.94     | 27.96                  | 18.19                  | 38.72  | 39.25   |
| <b>Standard deviation</b>    | 3.76   | 3.03      | 4.22                   | 2.31                   | 6.48   | 6.56    |

### 3.3. Dynamic Light Adsorption measurements

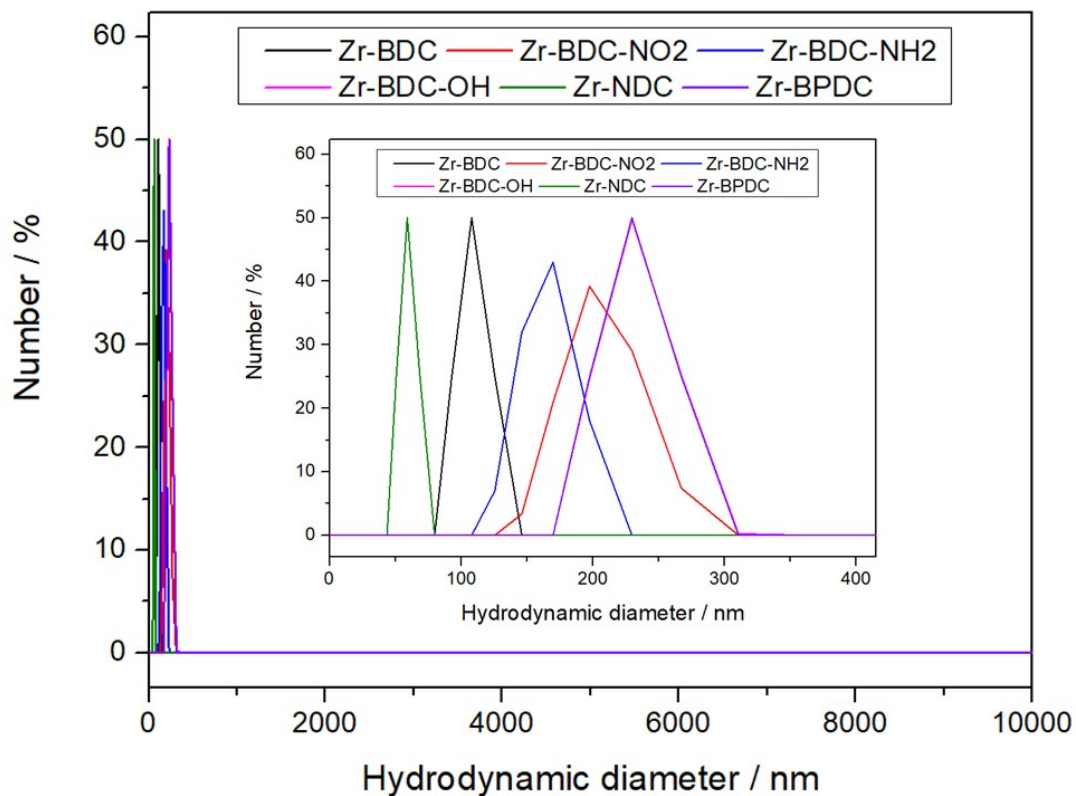

**Figure S14:** Hydrodynamic diameter determined by Dynamic Light Scattering measurements of ca. 0.1 mg mL<sup>-1</sup> dispersions in MeOH.



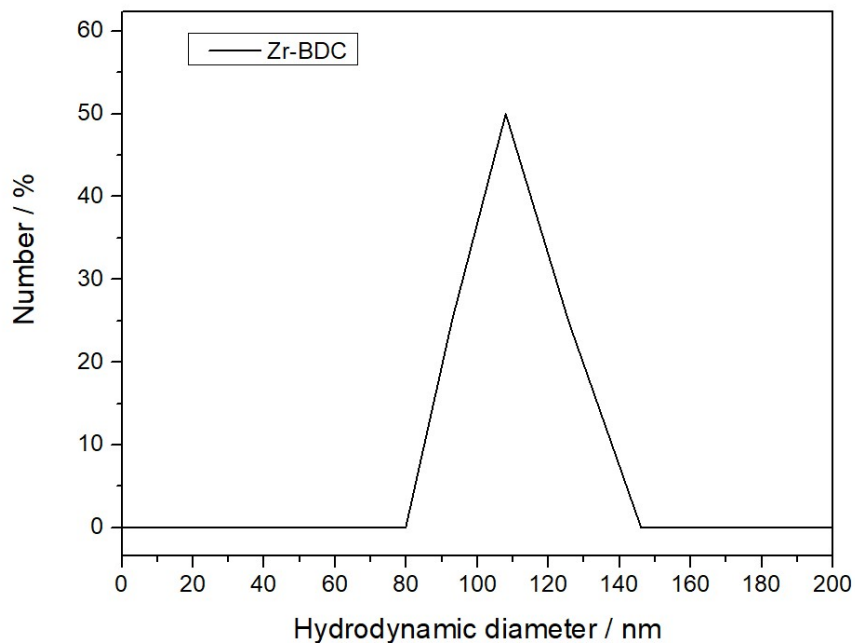

**Figure S15:** Hydrodynamic diameter of Zr-BDC determined by Dynamic Light Scattering measurements of *ca.* 0.1 mg mL<sup>-1</sup> dispersions in MeOH.

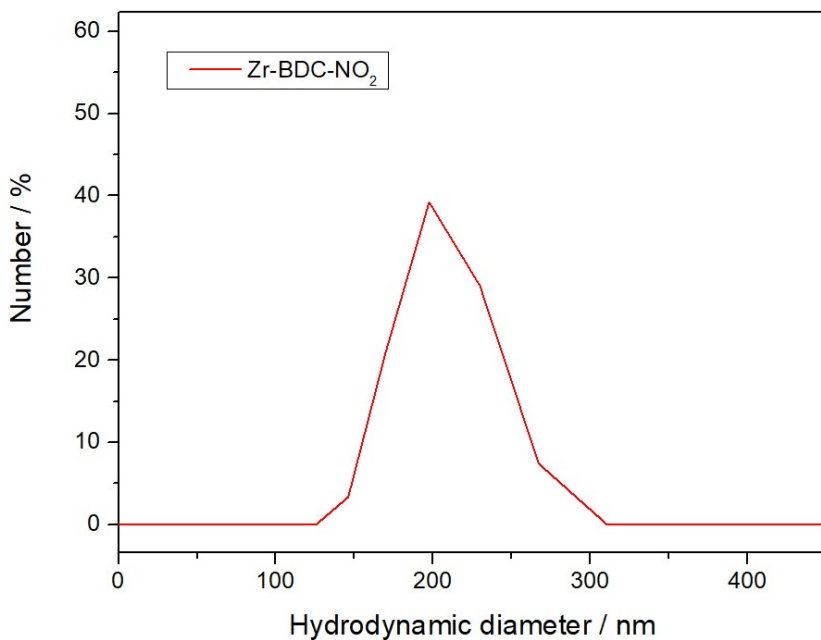

**Figure S16:** Hydrodynamic diameter of Zr-BDC-NO<sub>2</sub> determined by Dynamic Light Scattering measurements of *ca.* 0.1 mg mL<sup>-1</sup> dispersions in MeOH.

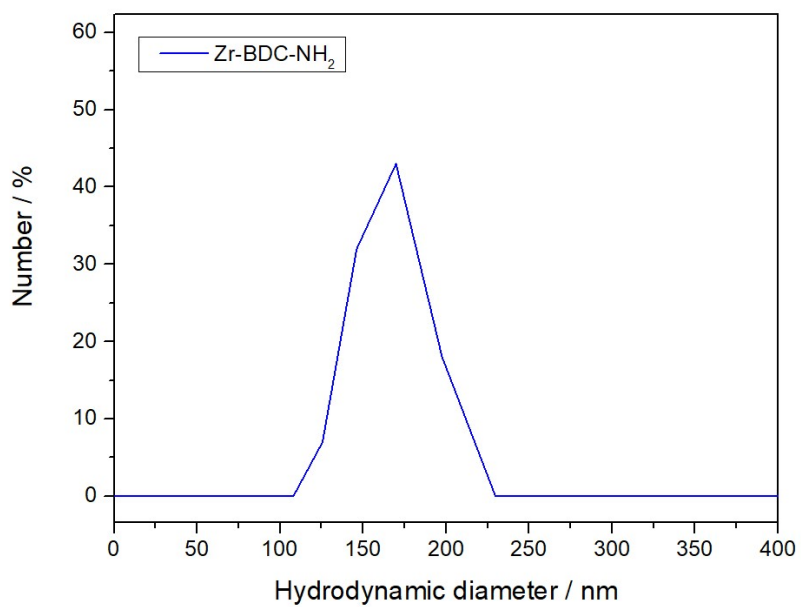

**Figure S17:** Hydrodynamic diameter of Zr-BDC-NH<sub>2</sub> determined by Dynamic Light Scattering measurements of ca. 0.1 mg mL<sup>-1</sup> dispersions in MeOH.

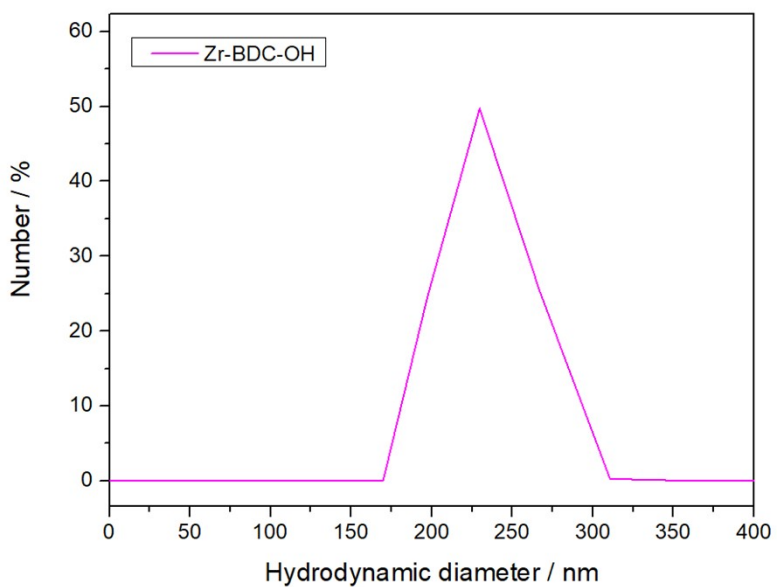

**Figure S18:** Hydrodynamic diameter of Zr-BDC-OH determined by Dynamic Light Scattering measurements of ca. 0.1 mg mL<sup>-1</sup> dispersions in MeOH.

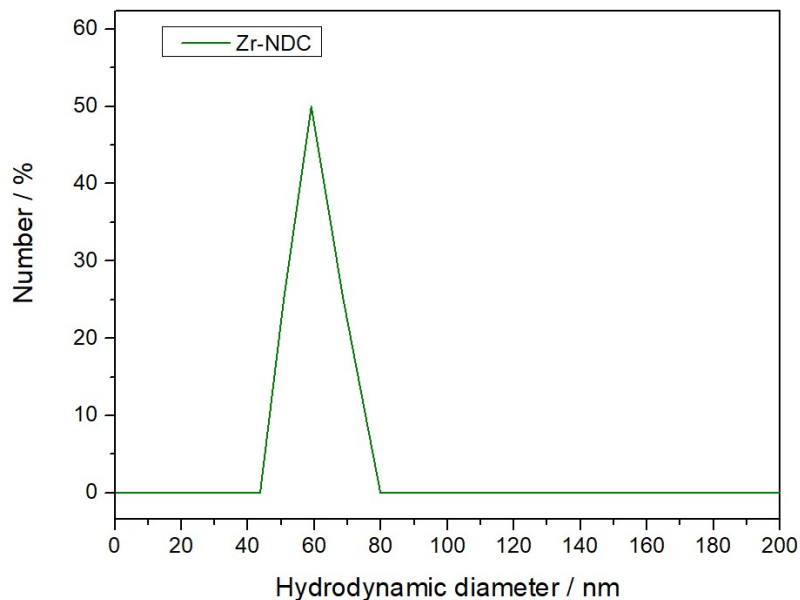

**Figure S19:** Hydrodynamic diameter of Zr-NDC determined by Dynamic Light Scattering measurements of ca. 0.1 mg mL<sup>-1</sup> dispersions in MeOH.

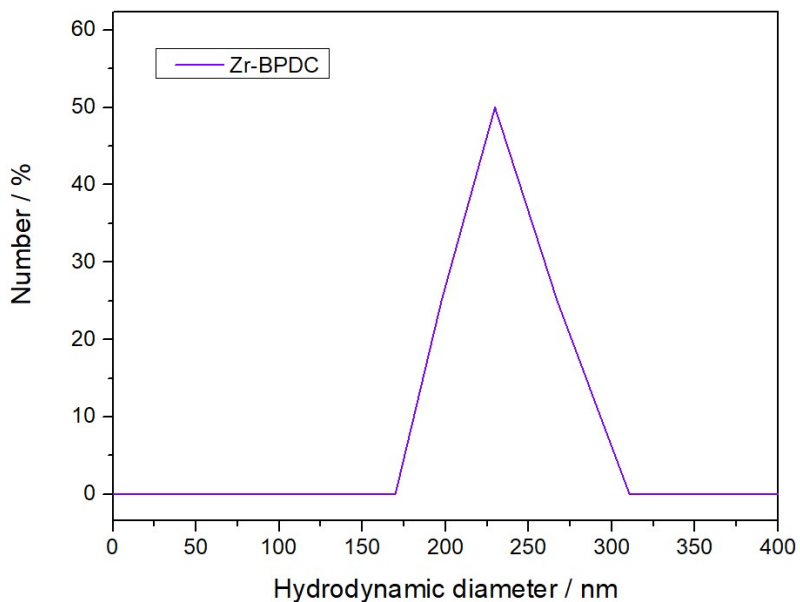

**Figure S20:** Hydrodynamic diameter of Zr-BPDC determined by Dynamic Light Scattering measurements of ca. 0.1 mg mL<sup>-1</sup> dispersions in MeOH.

### S.3.4. N<sub>2</sub> adsorption and desorption isotherms

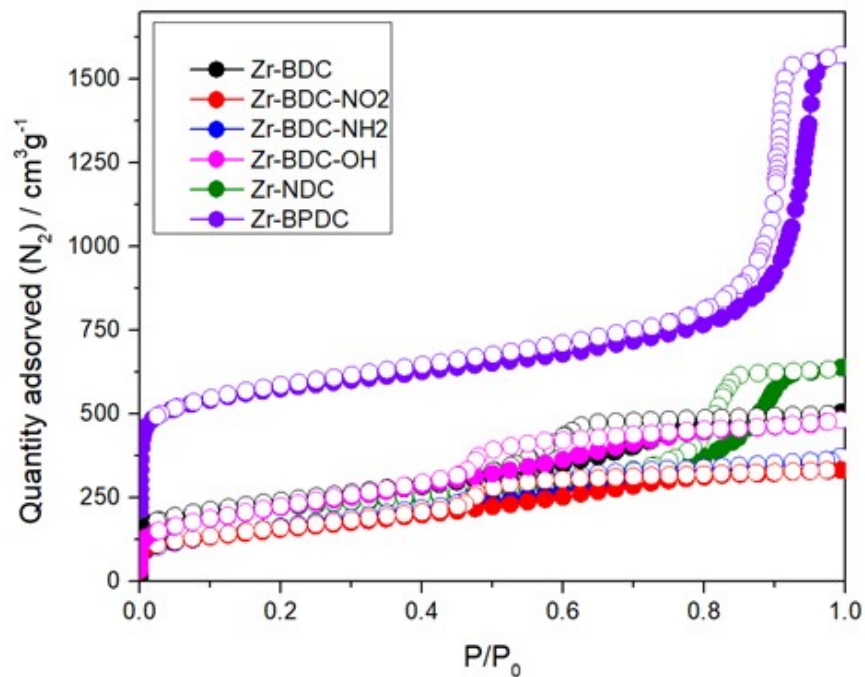

**Figure S21:** N<sub>2</sub> adsorption and desorption isotherms of ultra-small Zr-MOFs

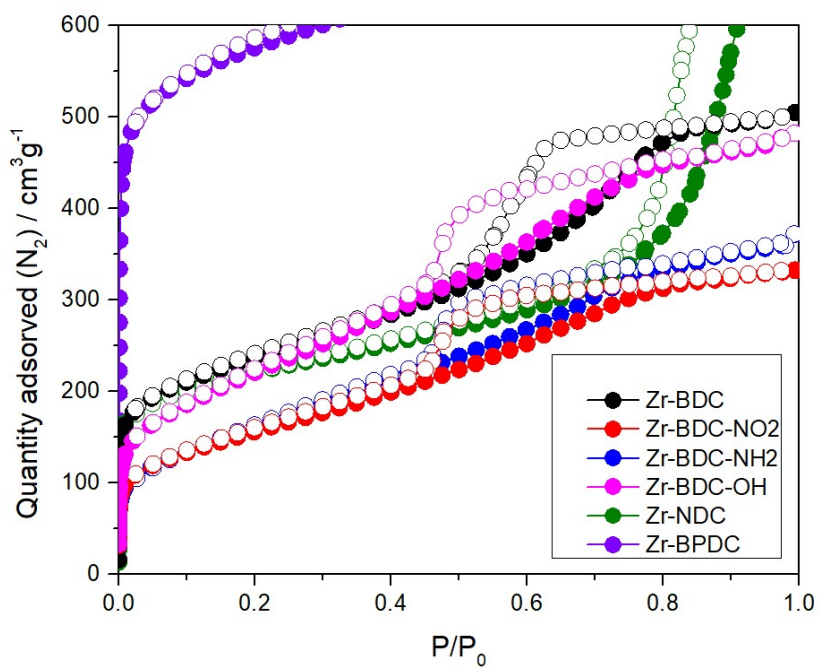

**Figure S22:** Amplification of N<sub>2</sub> adsorption and desorption isotherms of ultra-small Zr-MOFs showing hysteresis loops characteristic of mesoporous materials.

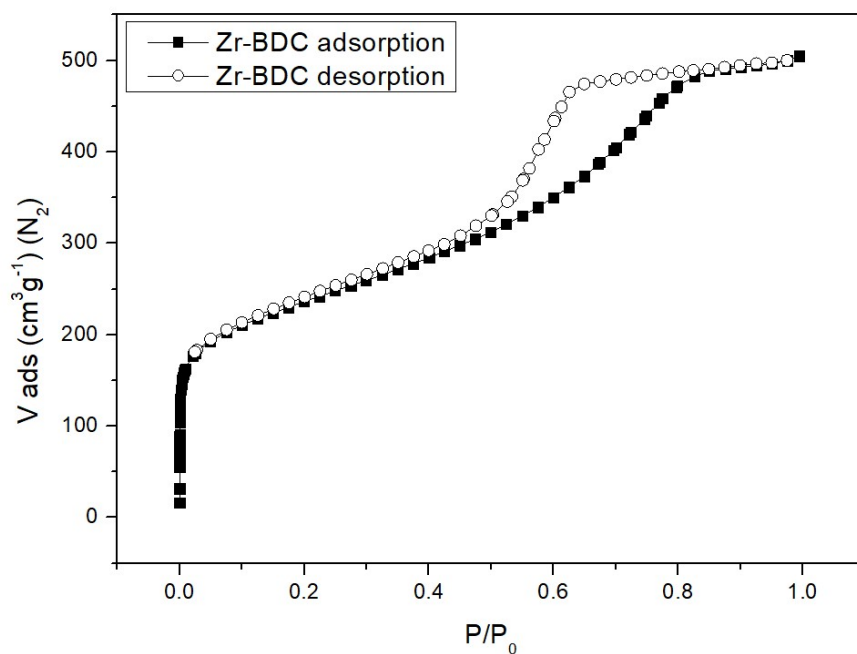

**Figure S23:**  $\text{N}_2$  adsorption and desorption isotherm of ultra-small Zr-BDC showing hysteresis characteristic of mesoporous materials.

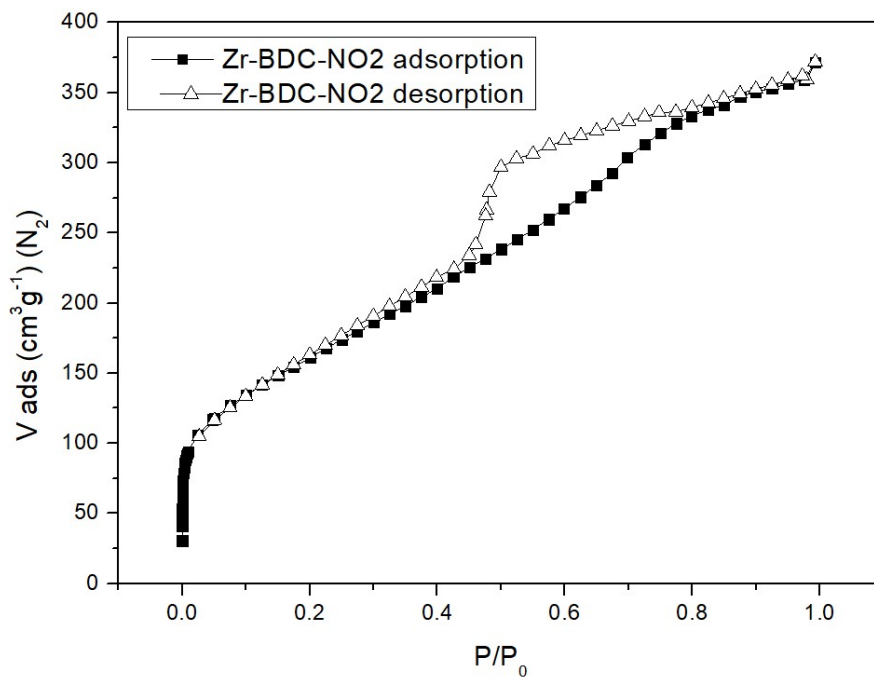

**Figure S24:**  $\text{N}_2$  adsorption and desorption isotherm of ultra-small Zr-BDC-NO<sub>2</sub> showing hysteresis characteristic of mesoporous materials.

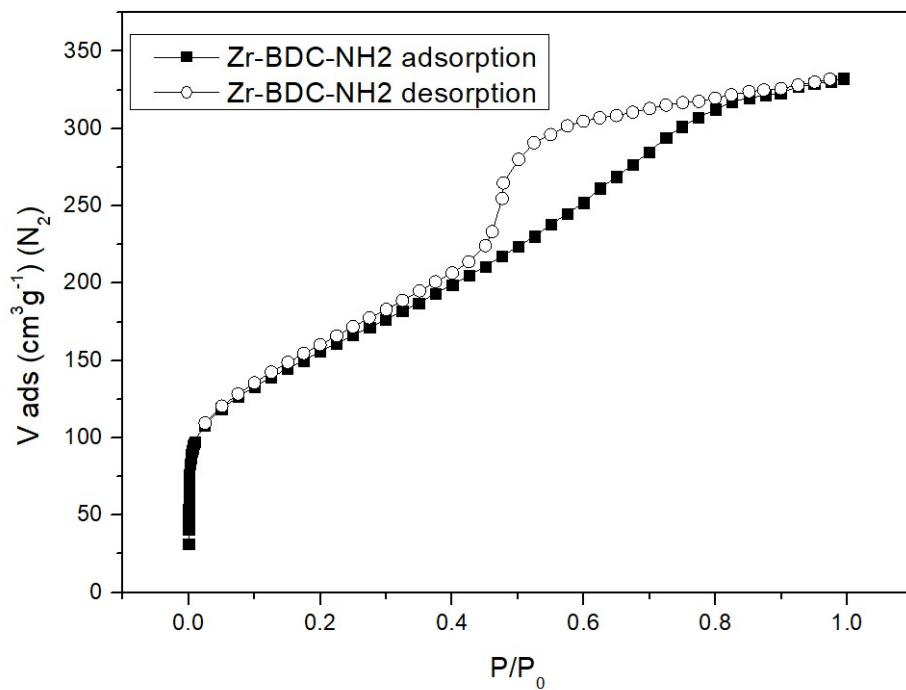

**Figure S25:** N<sub>2</sub> adsorption and desorption isotherm of ultra-small Zr-BDC-NH<sub>2</sub> showing hysteresis characteristic of mesoporous materials.

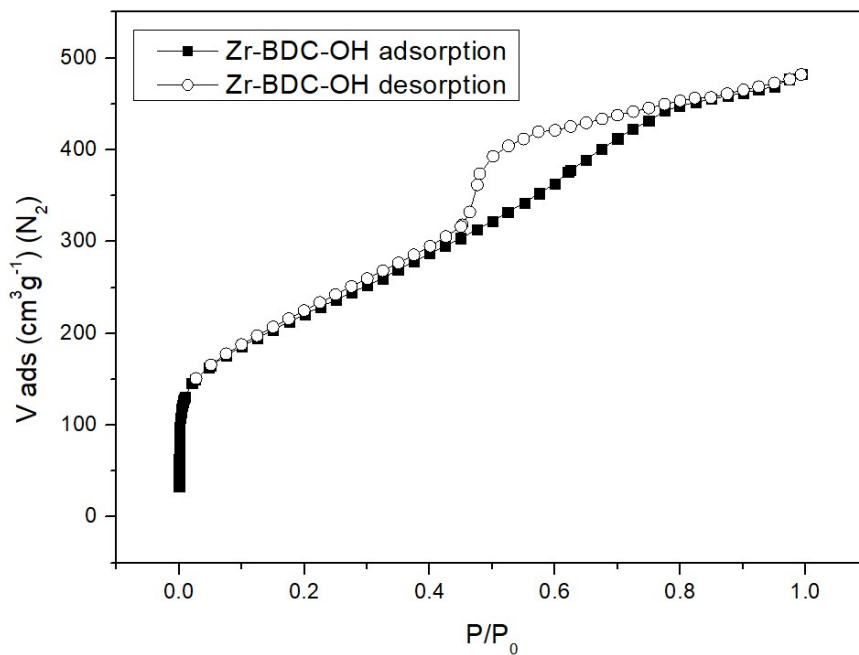

**Figure S26:** N<sub>2</sub> adsorption and desorption isotherm of ultra-small Zr-BDC-OH showing hysteresis characteristic of mesoporous materials.

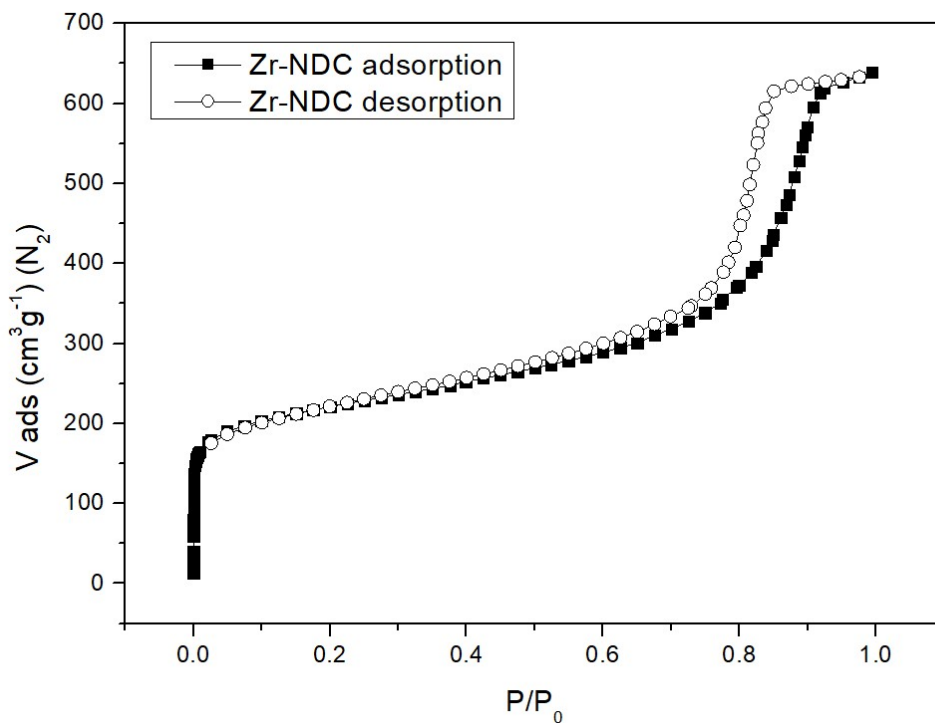

**Figure S27:**  $\text{N}_2$  adsorption and desorption isotherm of ultra-small Zr-NDC showing hysteresis characteristic of mesoporous materials.

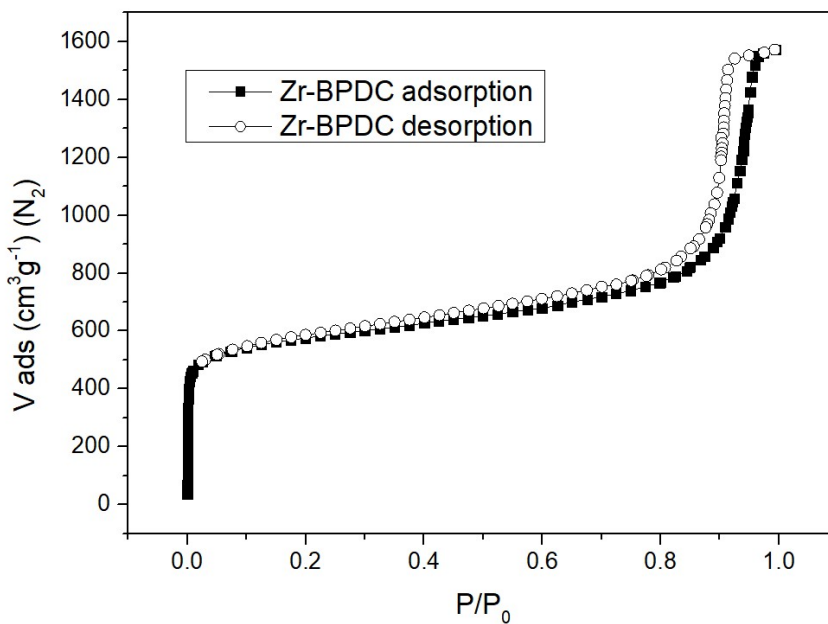

**Figure S28:**  $\text{N}_2$  adsorption and desorption isotherm of ultra-small Zr-BPDC showing hysteresis characteristic of mesoporous materials.

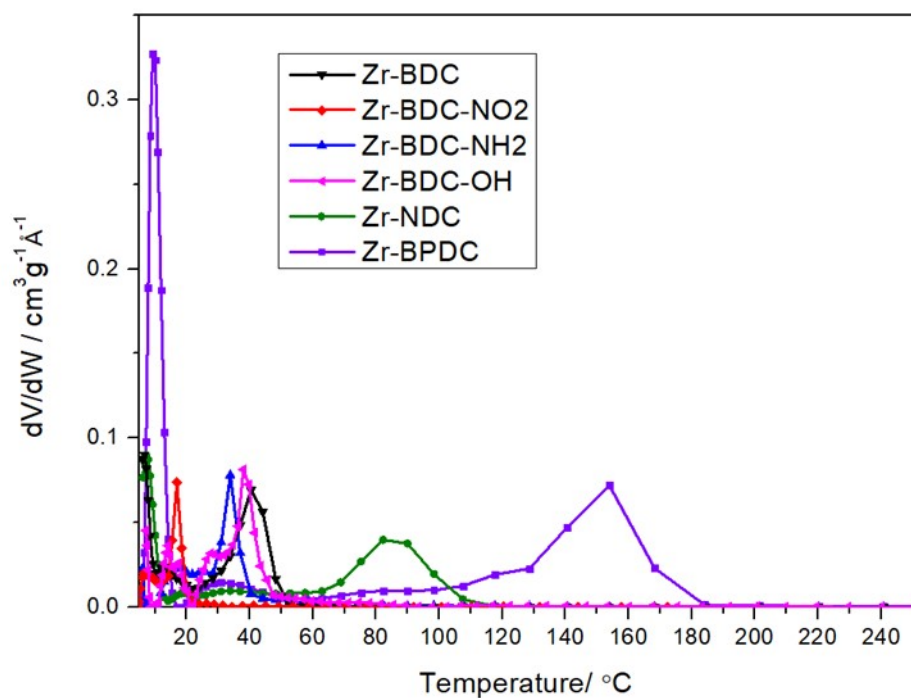

**Figure S29:** Pore size distributions extracted from the  $N_2$  adsorption and desorption isotherms of ultra-small Zr-MOFs. Pore size distributions calculated with DFT Cylindrical oxide surface pore model.

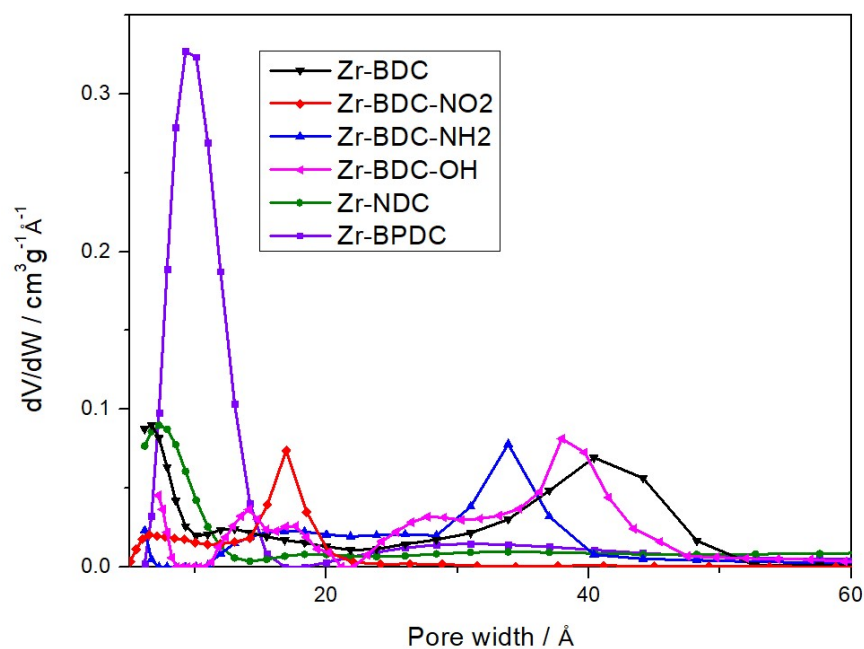

**Figure S30:** Pore size distributions extracted from the  $N_2$  adsorption and desorption isotherms of ultra-small Zr-MOFs. Pore size distributions calculated with DFT Cylindrical oxide surface pore model.



**Table S2:** Tabulated data extracted from N<sub>2</sub> adsorption and desorption measurements of ultra-small Zr-MOFs.

| Sample                 | BET Surface area               | Total Pore volume               | Micropore volume                | mesopore volume                 | %mesopore volume |
|------------------------|--------------------------------|---------------------------------|---------------------------------|---------------------------------|------------------|
|                        | m <sup>2</sup> g <sup>-1</sup> | cm <sup>3</sup> g <sup>-1</sup> | cm <sup>3</sup> g <sup>-1</sup> | cm <sup>3</sup> g <sup>-1</sup> | %                |
| Zr-BDC                 | 894                            | 0.74                            | 0.25                            | 0.48                            | 65.9             |
| Zr-BDC-OH              | 452                            | 0.49                            | 0.45                            | 0.04                            | 7.9              |
| Zr-BDC-NO <sub>2</sub> | 484                            | 0.53                            | 0.15                            | 0.38                            | 71.5             |
| Zr-BDC-NH <sub>2</sub> | 593                            | 0.69                            | 0.17                            | 0.52                            | 75.5             |
| Zr-NDC                 | 769                            | 0.94                            | 0.24                            | 0.71                            | 75.0             |
| Zr-BPDC                | 2006                           | 2.33                            | 0.74                            | 1.59                            | 68.3             |

### S.3.5. FT-IR

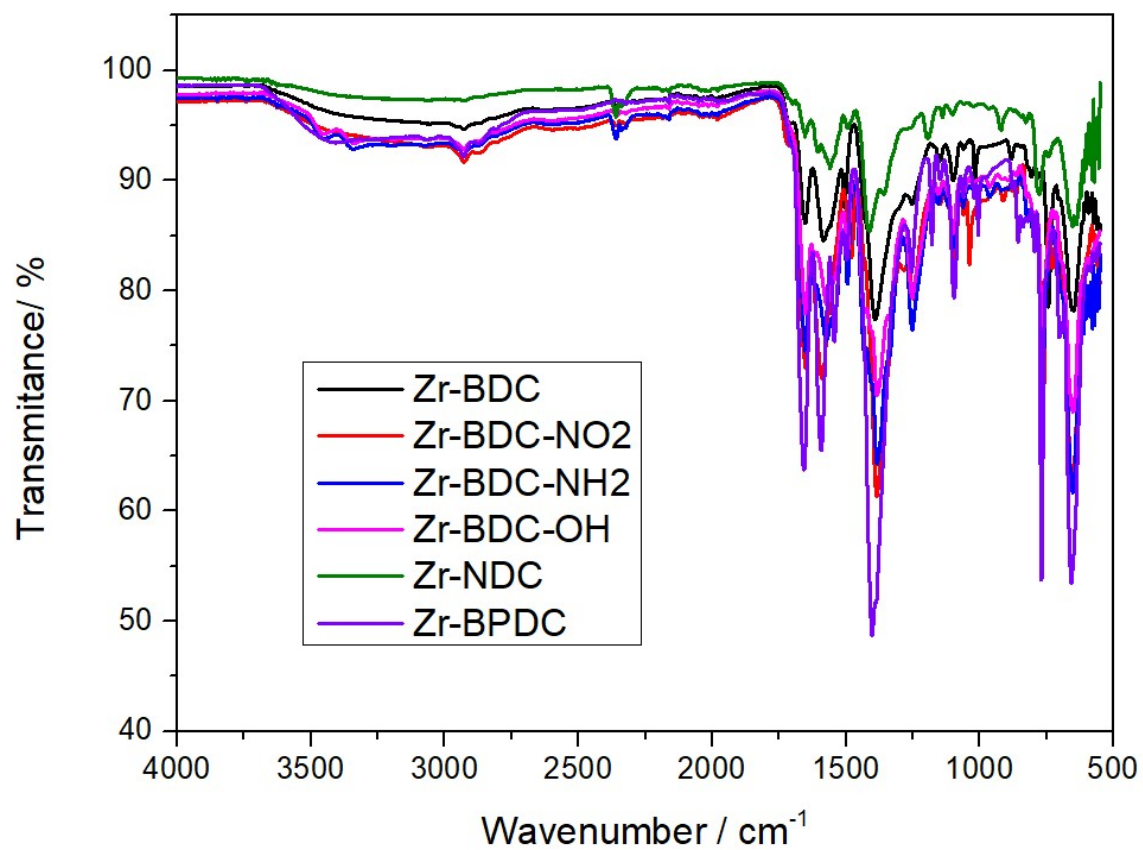

**Figure S31:** Raw FT-IR profiles of ultra-small Zr-MOF.

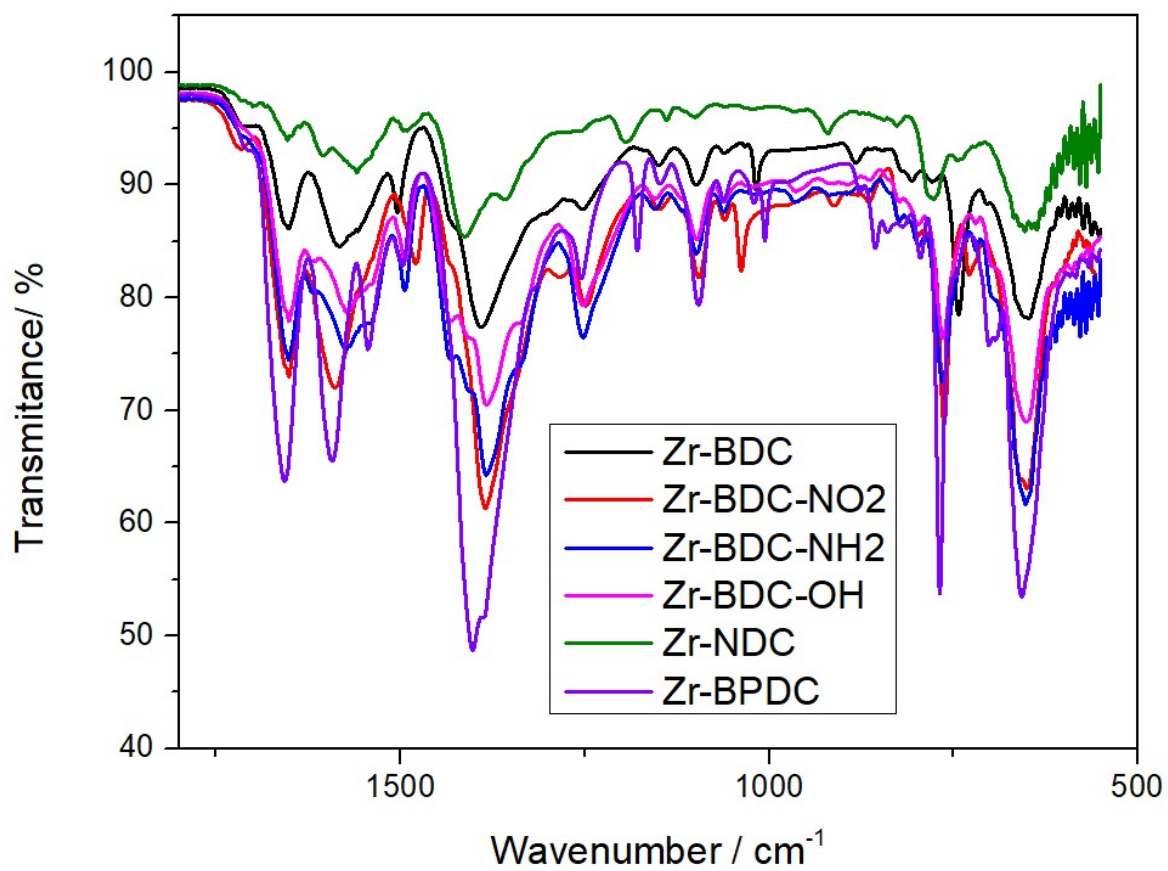

**Figure S32:** Amplification of raw FT-IR profiles of ultra-small Zr-MOF.

### S.3.6. <sup>1</sup>H-NMR Spectroscopic data

Formic acid coming from the decomposition of DMF during synthesis was present in the <sup>1</sup>H NMR spectra alongside with the modulator AcOH and DMF, possibly bonded to metals in the structure as defect-compensating ligand. Incorporation of modulator and formic acid is expressed as the **molar ratio** ( $R_{mod.}$ ) between modulator and bdc (Equation 1) and as the **molar percent** of modulator (mol%) compared to bdc (Equation 2), while the **total modulator percent** (total mod%) is calculated taking into account modulator, formic acid and bdc (Equation 3).

**Equation 1:** molar ratio ( $R_{mod.}$ ) between modulator and bdc.

$$R_{mod} = \frac{Mod}{bdc}$$

**Equation 2:** molar percent of modulator (mol%) compared to bdc.

$$mol\% = \frac{Mod}{Mod + bdc} * 100$$

**Equation 3:** total modulator percent (total mod%).

$$total\ mod\% = \frac{Mod + FA}{Mod + FA + bdc} * 100$$

**Table S3:** Tabulated data extracted from <sup>1</sup>H NMR spectra of acid digested ultra-small Zr-MOFs as molar ratio (r mod) and molar percent (% mod)

|                        | r acoh | rfa   | rdmf  | %acoh | %fa  | %dmf |
|------------------------|--------|-------|-------|-------|------|------|
| Zr-BDC                 | 0.179  | 0.081 | 0.436 | 15.2  | 7.5  | 30.4 |
| Zr-BDC-OH              | 0.404  | 0.755 | 0.091 | 28.8  | 43.0 | 8.3  |
| Zr-BDC-NO <sub>2</sub> | 1.058  | 0.294 | 0.143 | 51.4  | 22.7 | 12.5 |
| Zr-BDC-NH <sub>2</sub> | 0.392  | 0.118 | 0.324 | 28.2  | 10.6 | 24.5 |
| Zr-NDC                 | 0.180  | 0.178 | 0.427 | 15.3  | 15.1 | 29.9 |
| Zr-BPDC                | 0.147  | 0.674 | 1.463 | 12.8  | 40.3 | 59.4 |

Note that formic acid comes from the decomposition of DMF during synthesis. <sup>1</sup>

### S.3.7. Thermogravimetric Analysis

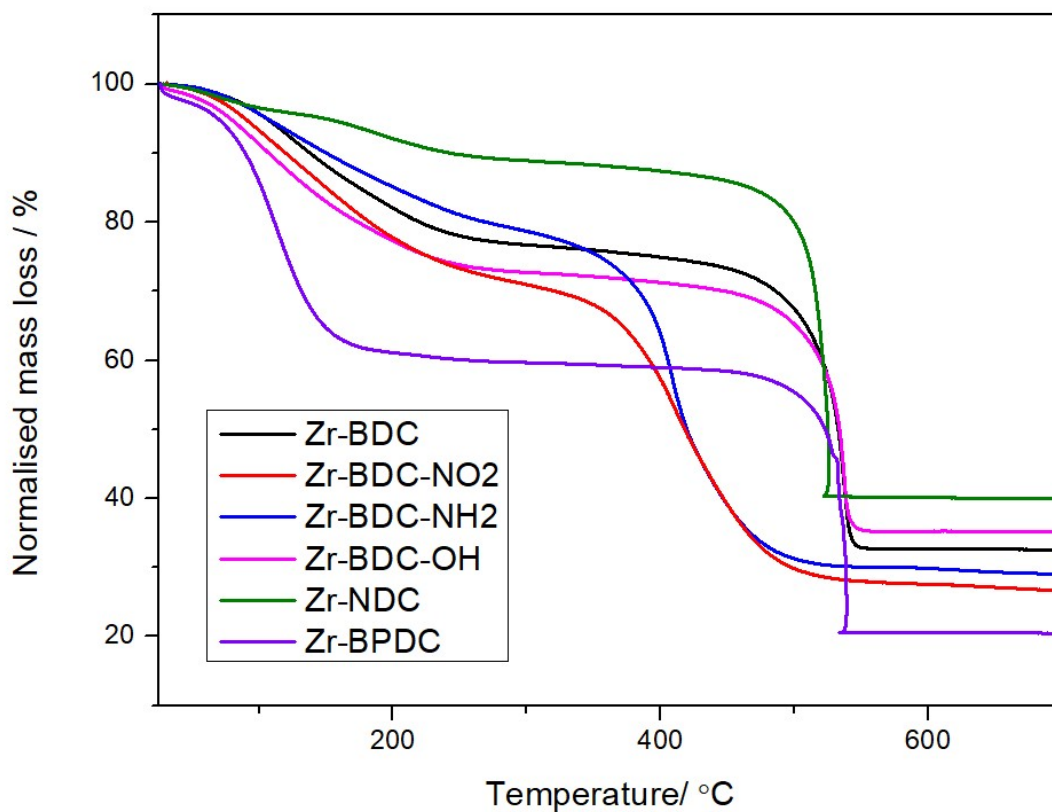

**Figure S33:** TGA profiles of ultra-small Zr-MOF, with the start of the decomposition profiles normalised to 100%.

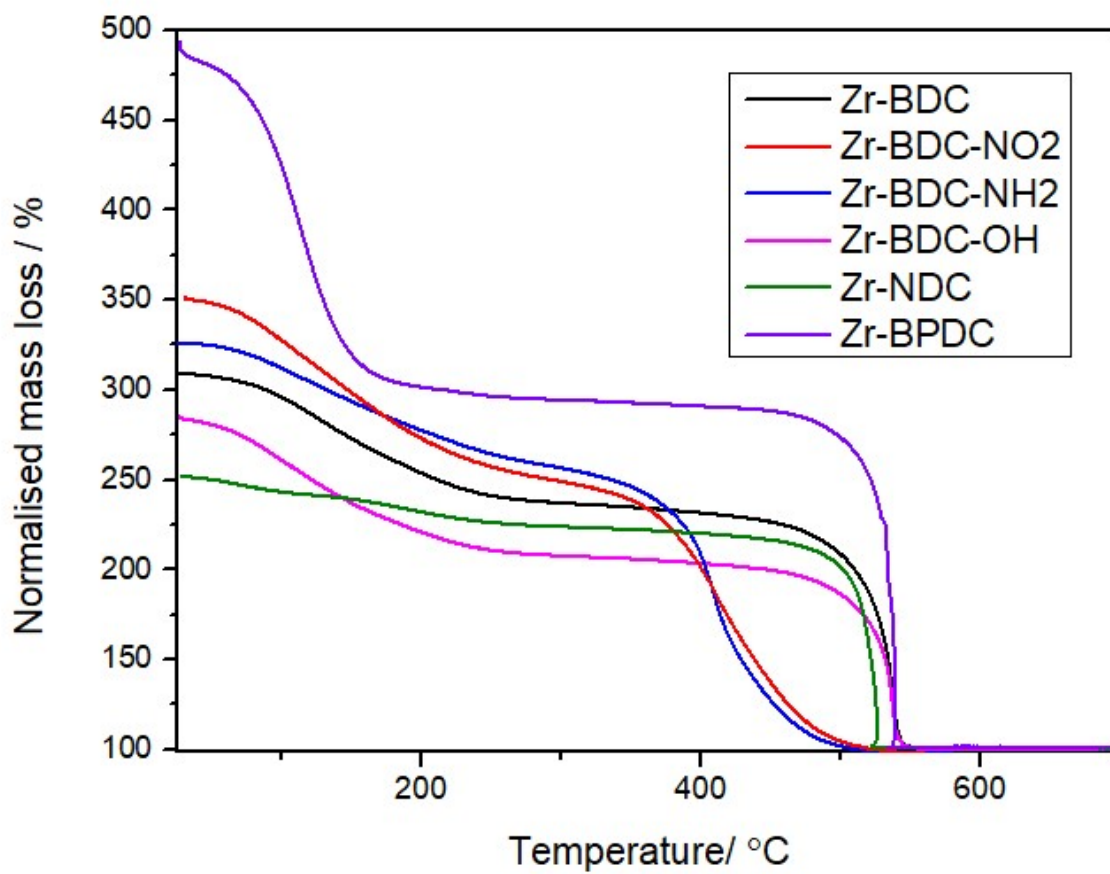

**Figure S34:** TGA profiles of ultra-small Zr-MOF, with the residues normalised to 100%.

Due to the clear start of the dehydrated MOF (DH MOF) decomposition profile (prior to the decomposition of linkers, at ca. 400°C) and to the presence of DMF molecules (characterized by <sup>1</sup>H NMR spectroscopy) that could be paired with defect-compensating OH<sup>-</sup> molecules to balance the coordination number of the metals, we have analyzed the thermal decomposition profiles to obtain the number of linkers in the structures based on the mass ratio between the DH MOF and the thermal residue ( $R_{expDH}$ ). It is important to note that both FA, AcOH and DMF decompose before the DH MOF leading to the  $ZrOL_xO_{1-x}$  structure. Hence, the formula will be:<sup>2</sup>

$$R_{expDH} = \frac{M_w [DH MOF]}{M_w [Residue]} = \frac{M_w [ZrO(L)_xO_{1-x}]}{M_w [ZrO_2]}$$

Then,

$$X \text{ Ligands} = \frac{(R_{expDH} * M_w [ZrO_2]) - M_w [ZrO] - M_w [O]}{M_w [L] - M_w [O]}$$

Once the number of linkers in the structure has been calculated, the number of modulators (FA and ACOH) are obtained by multiplying the number of linker by the mod/L molar ratio determined by <sup>1</sup>H NMR spectroscopy (Table S3).

Then, the number of OH<sup>-</sup> molecules compensating for the charge arising from the missing linkers is calculated using the charge balance equation.

$$4 (\text{Charge Zr}) = \frac{4}{6} * 2 O + \frac{4}{6} * OH + 2 * X \text{ Ligand} + Y \text{ Mod1} + Z \text{ Mod2} + D OH ;$$

$$D OH = 2 - 2 * X \text{ Ligand} - y \text{ Mod1} - z \text{ Mod2}$$

The values of  $R_{exp}$  and  $R_{expDH}$  are given in **Table S4**, and the composition values obtained by this method in **Tables S4** and **S5**.

**Table S4:** Rexp and RexpDH values extracted from TGA analysis.

| SAMPLE                 | R <sub>EXP</sub> | R <sub>EXPDH</sub> | L/Zr  |
|------------------------|------------------|--------------------|-------|
| Zr-BDC                 | 3.0248           | 2.1700             | 0.973 |
| Zr-BDC-OH              | 3.46             | 2.27               | 0.810 |
| Zr-BDC-NO <sub>2</sub> | 3.88             | 2.31               | 0.989 |
| Zr-BDC-NH <sub>2</sub> | 2.84             | 2.04               | 0.781 |
| Zr-NDC                 | 2.52             | 2.24               | 0.771 |
| Zr-BPDC                | 4.8              | 2.79               | 0.984 |

**Table S5:** Data extracted from TGA analysis for the model framework  $(Zr_6O_6(OH)_6(L)_x(AcOH)_y(FA)_z$

| <b>SAMPLE</b>                | <b>PKA<sub>1</sub></b> | <b>6nL</b> | <b>6n FA</b> | <b>6nAcOH</b> | <b>%ML</b> | <b>OH / H<sub>2</sub>O</b> |
|------------------------------|------------------------|------------|--------------|---------------|------------|----------------------------|
| <b>Zr-BDC</b>                | 3.51                   | 5.839      | 0.472        | 1.048         | 2.681      | -1.198                     |
| <b>Zr-BDC-OH</b>             | 1.73                   | 4.861      | 3.668        | 1.964         | 18.976     | -3.355                     |
| <b>Zr-BDC-NO<sub>2</sub></b> | 3.95                   | 5.936      | 1.743        | 6.282         | 1.066      | -7.897                     |
| <b>Zr-BDC-NH<sub>2</sub></b> | 2.56                   | 4.684      | 0.551        | 1.837         | 21.927     | 0.243                      |
| <b>Zr-NDC</b>                | 3.69                   | 4.625      | 0.825        | 0.833         | 22.910     | 1.091                      |
| <b>Zr-BPDC</b>               | 3.77                   | 5.902      | 3.978        | 0.867         | 1.639      | -4.648                     |

It is important to take into account that since the particle size is very small, linker and/or modulators could be terminating the surfaces, which in this case are a highly relevant percent in the material, thus hindering the accurate compositional results. The values obtained for linker composition are more accurate as those are based in the  $R_{expDH}$  step of the thermal decomposition profile. Multiplying these values by the <sup>1</sup>H NMR spectroscopic ratios obtained for FA and OH modulators show that either FA, AcOH and/or the linkers are terminating the ultra-small nanoparticles surface, those giving higher coordination numbers than expected and resultant OH<sup>-</sup>/H<sub>2</sub>O negative values.



## S.4. Catalytic activity

### Kinetic study of the formylation of aniline

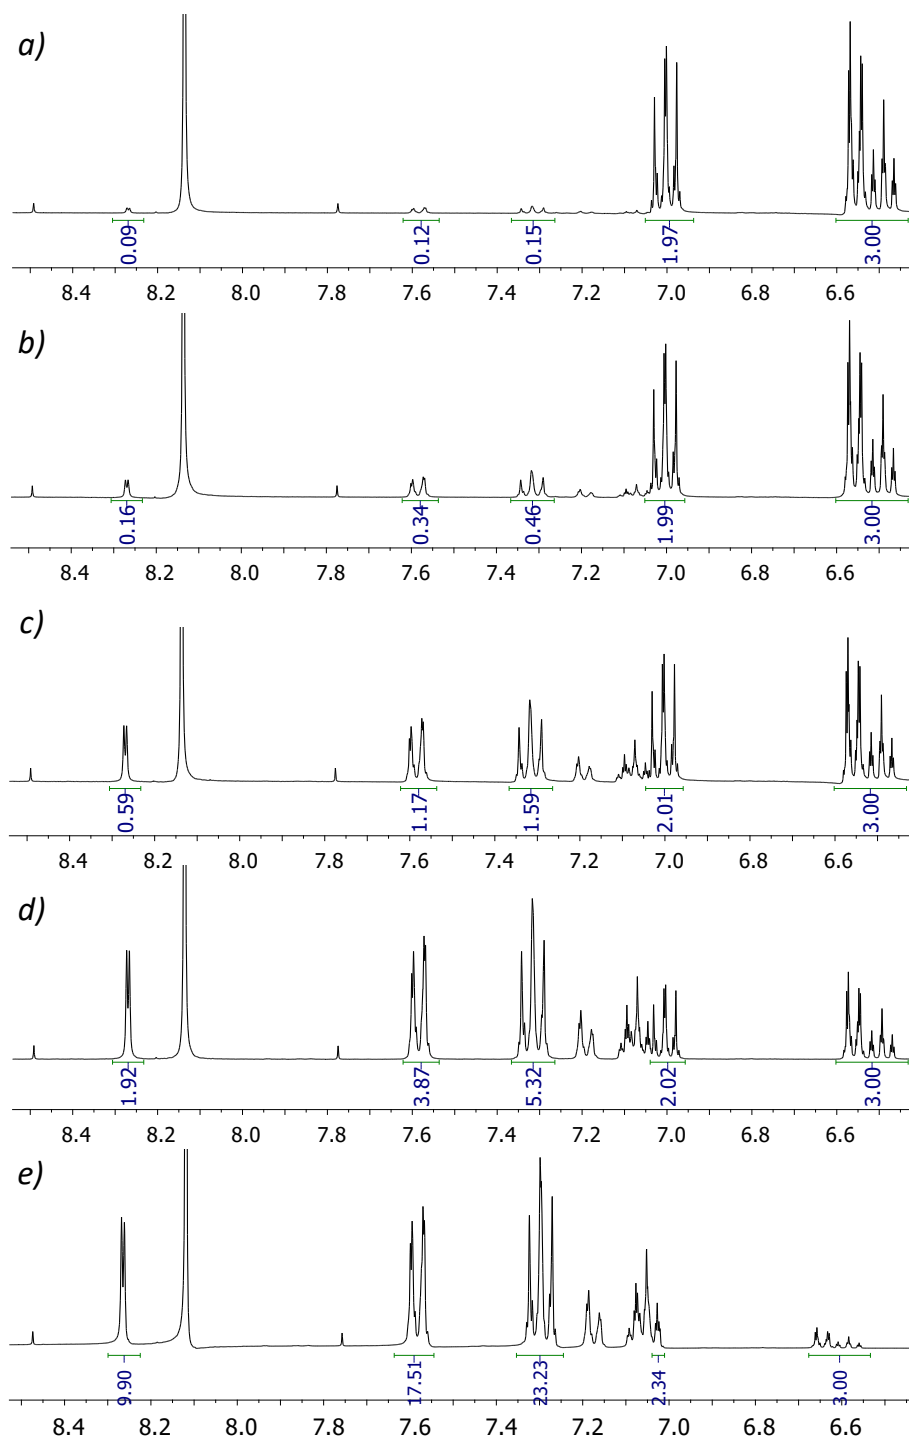

**Figure S35.** <sup>1</sup>H-NMR spectra (aromatic region) after 1 min (a), 8 min (b), 1 h (c), 4 h (d) and 1 day (e) of reaction between aniline (100  $\mu$ L) and formic acid (200  $\mu$ L) under solvent-free conditions at 35  $^{\circ}$ C in presence of MOF Zr-BDC-NH<sub>2</sub> (10 mg).

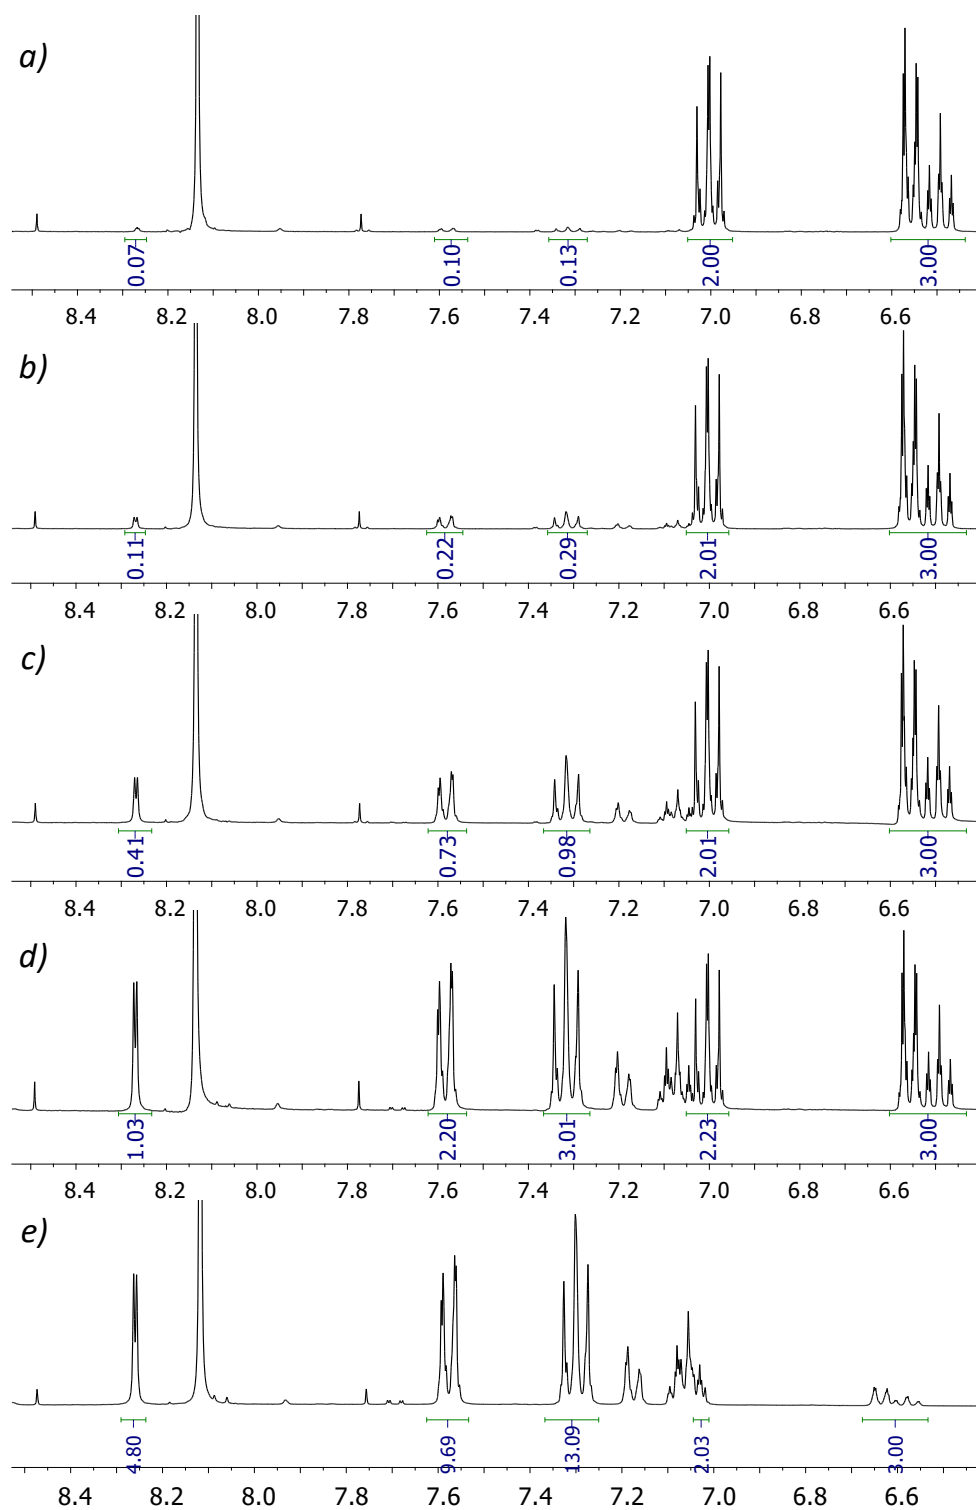

**Figure S36.** <sup>1</sup>H-NMR spectra (aromatic region) after 1 min (a), 8 min (b), 1 h (c), 4 h (d) and 1 day (e) of reaction between aniline (100  $\mu$ L) and formic acid (200  $\mu$ L) under solvent-free conditions at 35  $^{\circ}$ C in absence of MOF.

**Table S6.** Kinetic study of the solvent-free formylation of aniline (100  $\mu\text{L}$ ) with formic acid (200  $\mu\text{L}$ ) at 35°C in the presence or absence (blank) of Zr-BDC-NH<sub>2</sub> (10 mg).

| Time/h | Yield/%                |       |
|--------|------------------------|-------|
|        | Zr-BDC-NH <sub>2</sub> | Blank |
| 0.02   | 5                      | 4     |
| 0.13   | 13                     | 9     |
| 1      | 34                     | 25    |
| 4      | 64                     | 50    |
| 24     | 89                     | 81    |

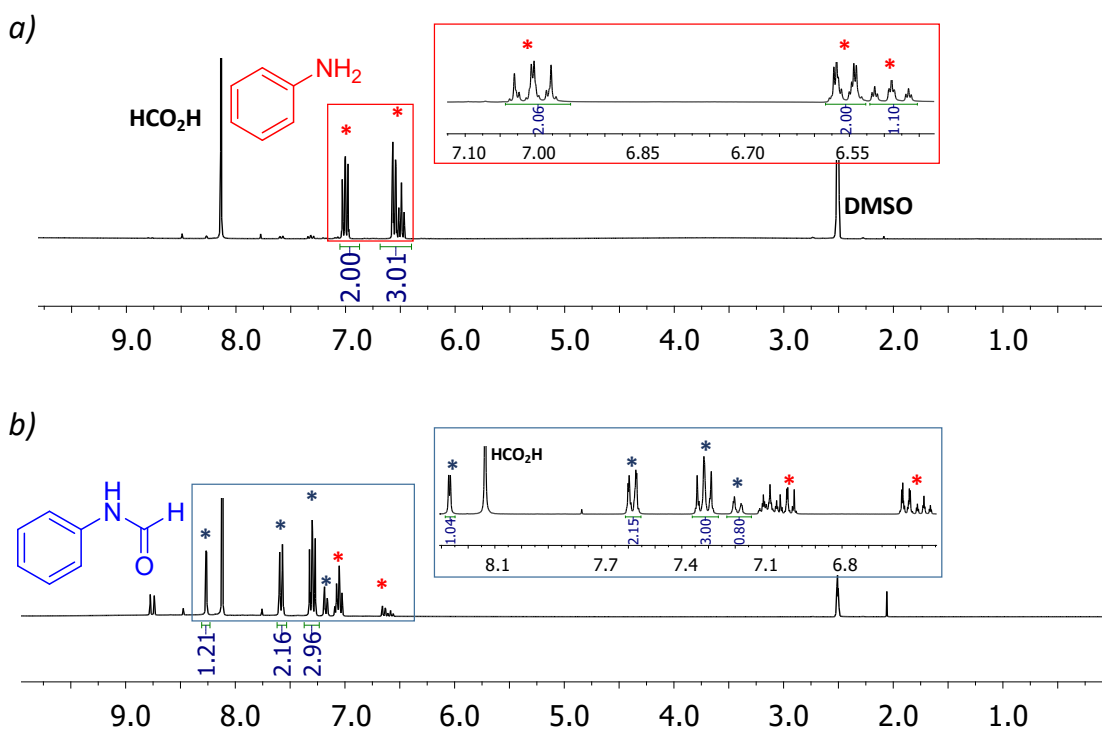

**Figure S37.** <sup>1</sup>H-NMR (300 MHz, DMSO) spectra of the (a) starting aniline (\*) and formic acid (in a 1:2 volume or 5 eq. excess) after 1 min of reaction (see zoom of the aromatic region at the right part) and (b) 89% yield *N*-Phenyl formamide product (\*) after 24 h of reaction (see zoom of the aromatic region at the right part). (a)  $\delta$  7.08-6.93 (m, 2H, Ar<sub>ortho</sub>-H), 6.61-6.45 (m, 3H, Ar<sub>meta,para</sub>-H). (b)  $\delta$  8.33-8.22 (brs, 1H, OC-H), 7.58 (m, 2H, Ar<sub>ortho</sub>-H), 7.39-7.25 (m, 3H, Ar<sub>meta,para</sub>-H), 7.19 (brs, 1H, N-H).

## Initial reaction rates

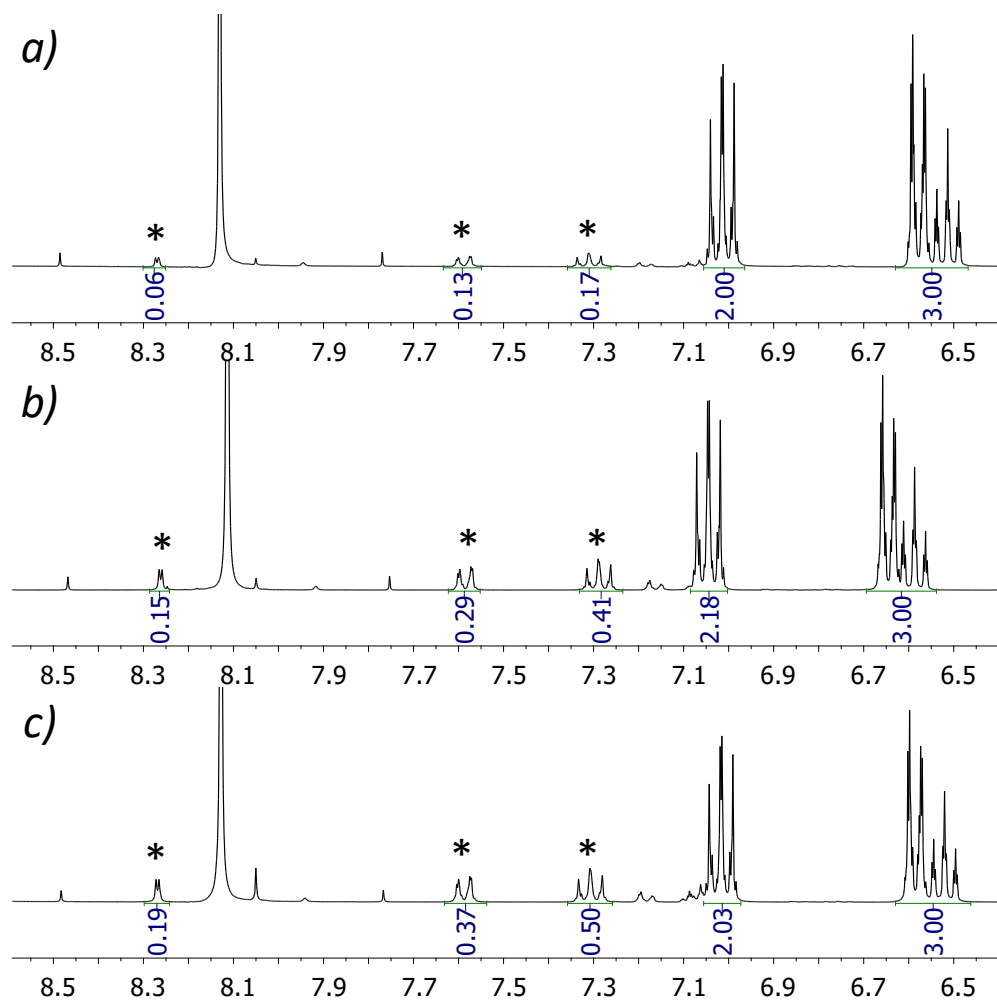

**Figure S38.** <sup>1</sup>H-NMR spectra (aromatic region) after 2 min (a), 5 min (b) and 10 min (c) of reaction between aniline and formic acid under solvent-free conditions in the presence of Zr-BDC. Reaction conditions: 5 eq. of acid, 10%wt. MOF, 35 °C.

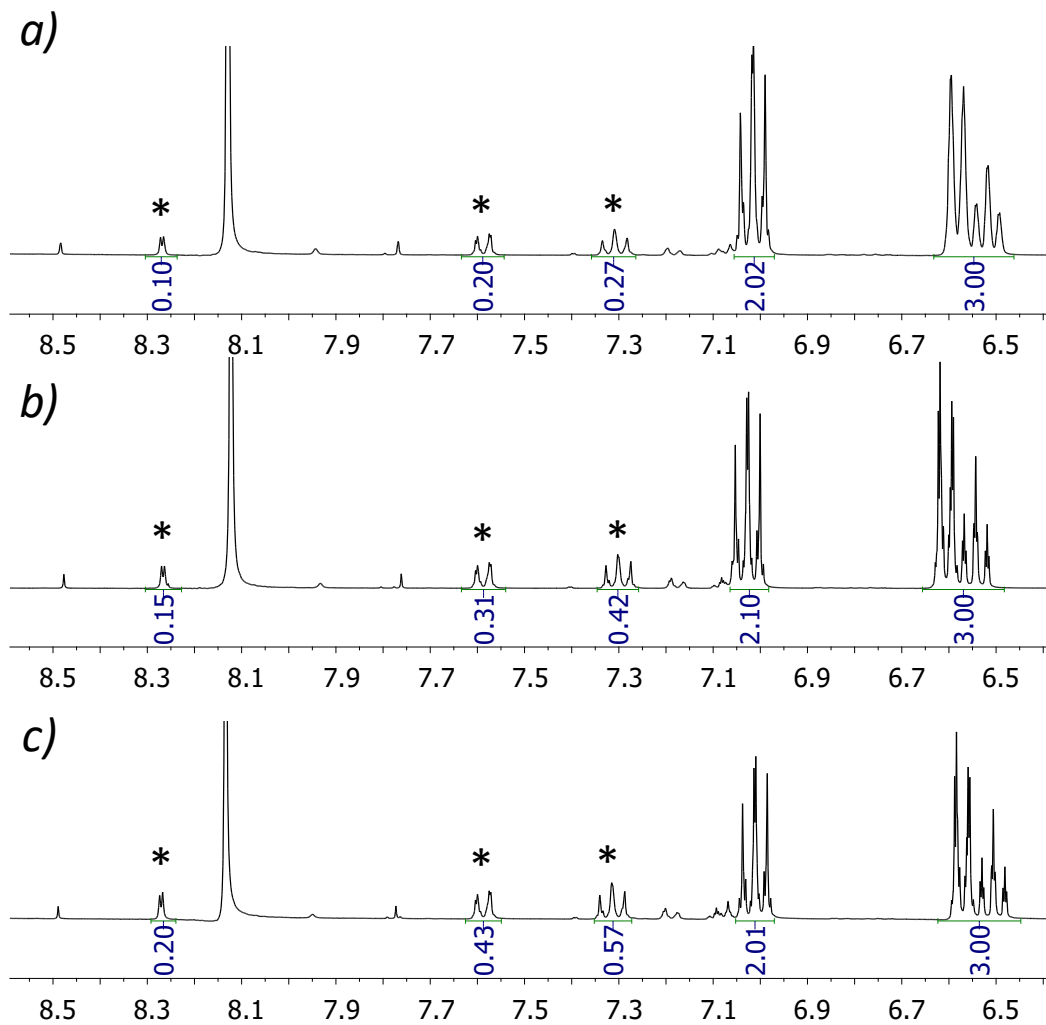

**Figure S39.** <sup>1</sup>H-NMR spectra (aromatic region) after 2 min (a), 5 min (b) and 10 min (c) of reaction between aniline and formic acid under solvent-free conditions in the presence of Zr-BDC-NH<sub>2</sub>. Reaction conditions: 5 eq. of acid, 10%wt. MOF, 35 °C.

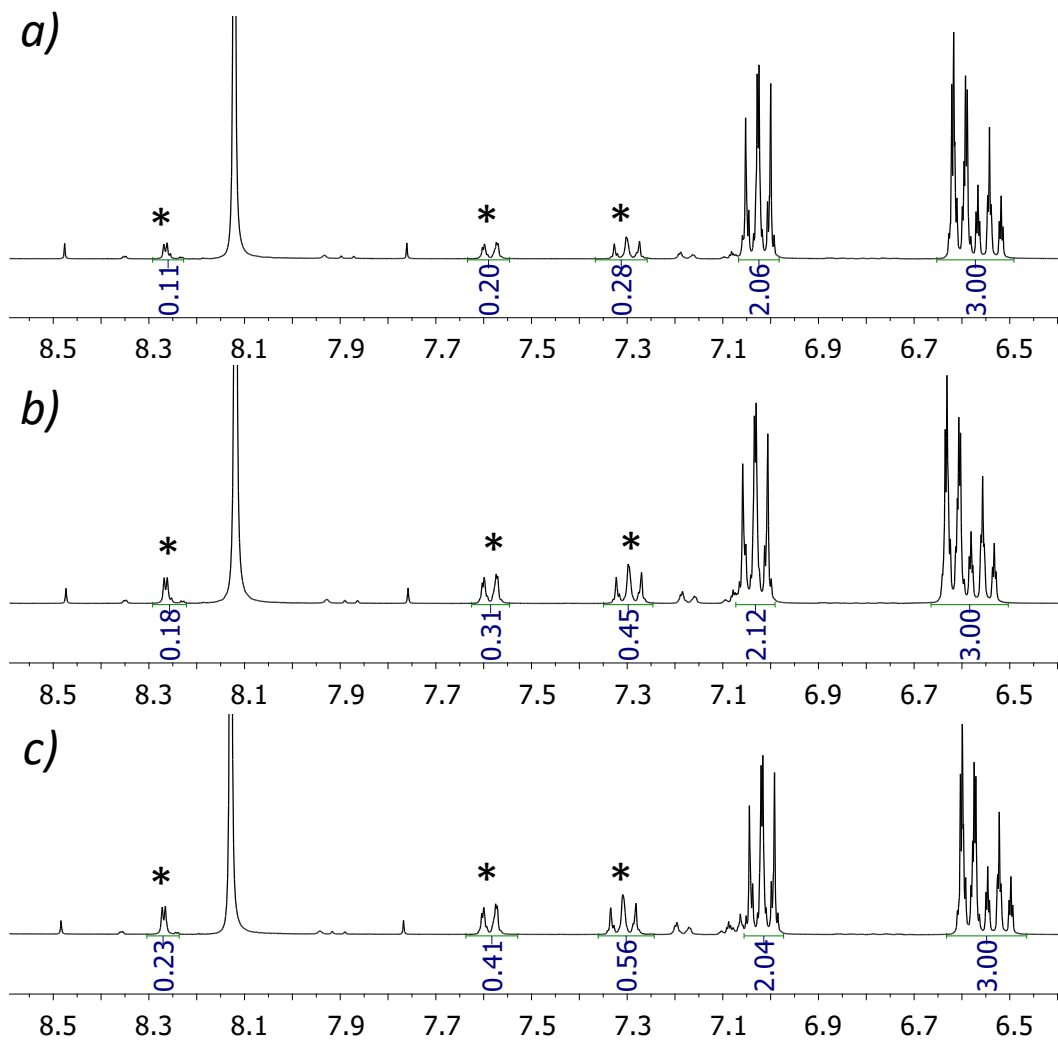

**Figure S40.**  $^1\text{H-NMR}$  spectra (aromatic region) after 2 min (a), 5 min (b) and 10 min (c) of reaction between aniline and formic acid under solvent-free conditions in the presence of Zr-BDC- $\text{NO}_2$ . Reaction conditions: 5 eq. of acid, 10%wt. MOF, 35 °C.

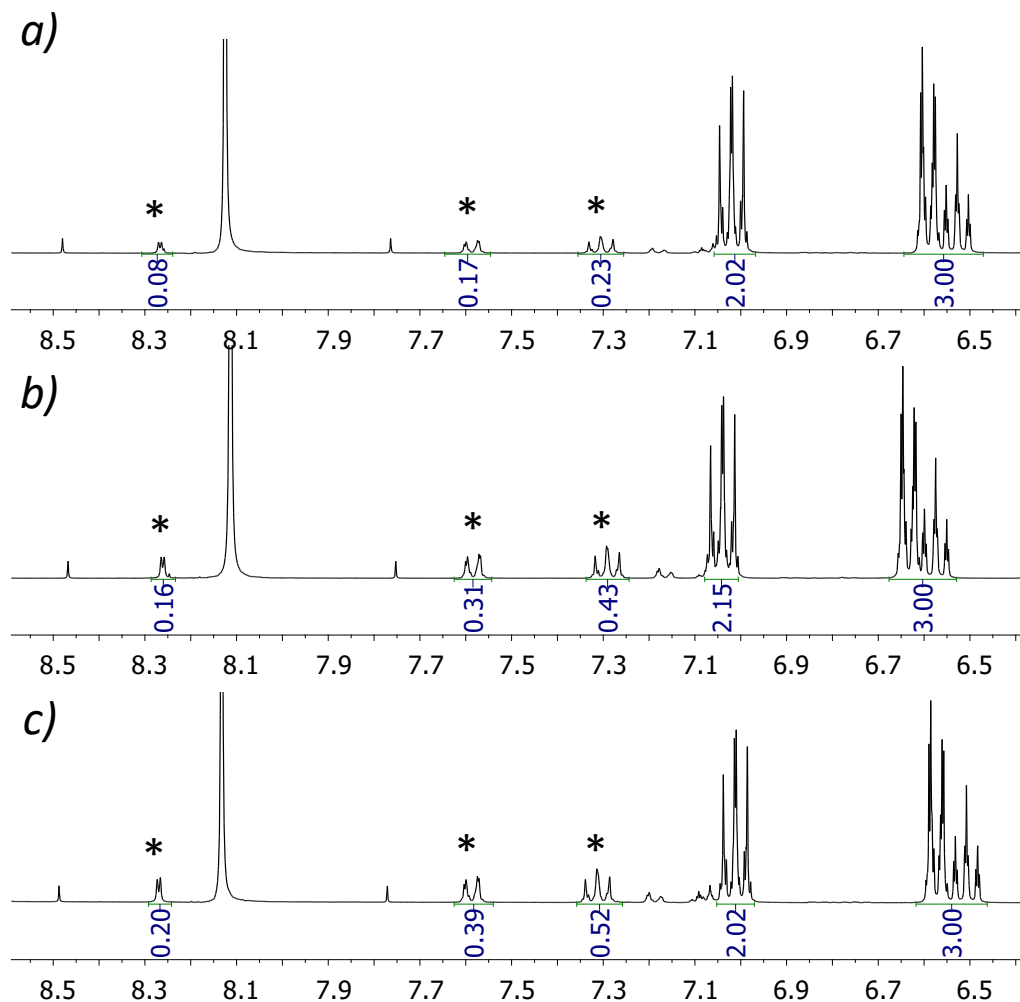

**Figure S41.**  $^1\text{H-NMR}$  spectra (aromatic region) after 2 min (a), 5 min (b) and 10 min (c) of reaction between aniline and formic acid under solvent-free conditions in absence of MOF. Reaction conditions: 5 eq. of acid,  $35^\circ\text{C}$ .

**Table S7.** Beginning of the solvent-free formylation of aniline (see Figs. S38-41) at  $35^\circ\text{C}$  under similar conditions to those of Table S6 for the calculation of initial reaction rates ( $r_0$ ).

| Sample                | Yield/ % (time/ min)                  | $r_0/ \text{mmol}\cdot\text{h}^{-1}$ |
|-----------------------|---------------------------------------|--------------------------------------|
| Zr-BDC                | 5% (2 min), 12% (5 min), 14% (10 min) | 1.7                                  |
| Zr-BDC- $\text{NO}_2$ | 9% (2 min), 13% (5 min), 16% (10 min) | 3.0                                  |
| Zr-BDC- $\text{NH}_2$ | 9% (2 min), 13% (5 min), 16% (10 min) | 3.0                                  |
| Zr-BDC-OH             | <7% (2 min)                           | <2.3                                 |
| Zr-NDC                | <7% (2 min)                           | <2.3                                 |
| Zr-BPDC               | <7% (2 min)                           | <2.3                                 |
| blank                 | 7% (2 min), 13% (5 min), 14% (10 min) | 2.3                                  |

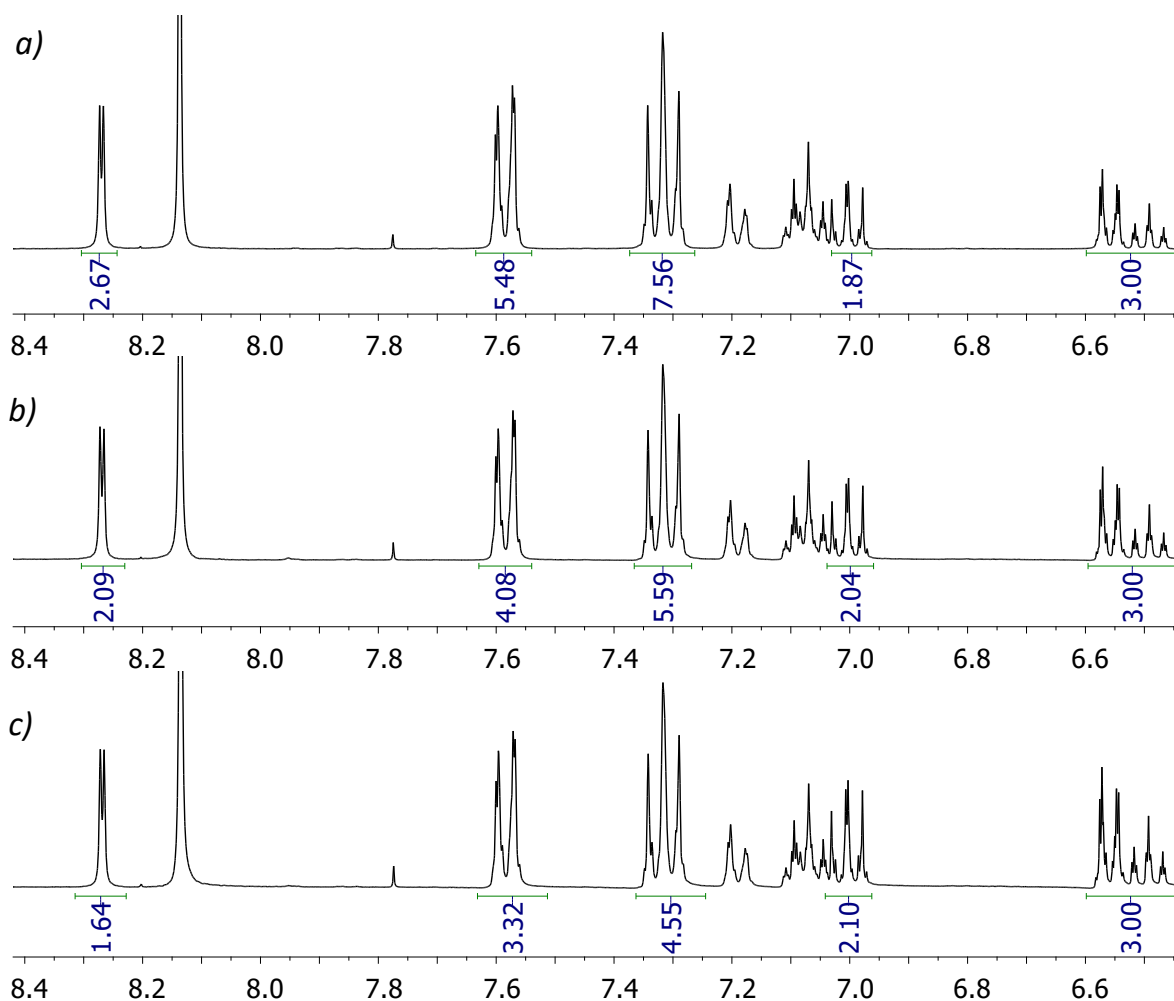

**Figure S42.** <sup>1</sup>H-NMR spectra (aromatic region) after 1<sup>st</sup> (a), 2<sup>nd</sup> (b) and 3<sup>rd</sup> (c) reaction cycles between aniline and formic acid under solvent-free conditions in presence of Zr-BDC-NH<sub>2</sub>.

**Table S8.** Recyclability and leaching of Zr-BDC-NH<sub>2</sub> in the solvent-free formylation of aniline at 35°C.<sup>a</sup>

| Run | Yield/% | Zr/ wt% total Zr <sup>b</sup> | Zr/ wt % sample <sup>c</sup> |
|-----|---------|-------------------------------|------------------------------|
| 1   | 72      | 1.57                          | 0.41                         |
| 2   | 65      | 1.14                          | 0.30                         |
| 3   | 52      | 1.93                          | 0.50                         |

<sup>a</sup> 30 mg MOF Zr-BDC-NH<sub>2</sub>, 200 μL aniline and 400 μL formic, 35 °C. Reaction time: 30 min. <sup>b</sup> considering only the Zr amount of the fresh MOF. <sup>c</sup> Considering the total mass of the MOF<sub>2</sub>.



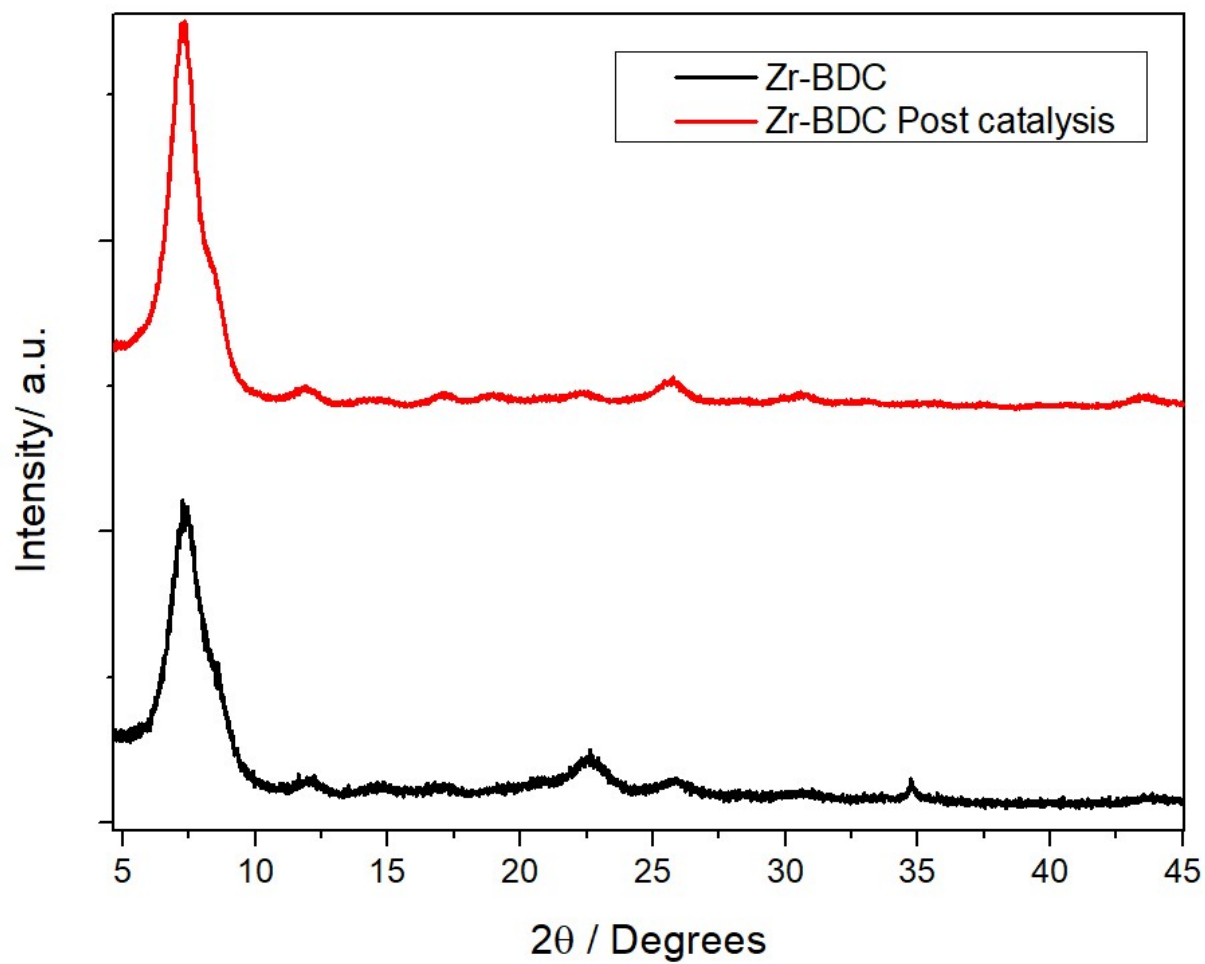

**Figure S43:** PXRD patterns of the ultra-small Zr-BDC MOF before and after 10 minutes of catalytic reaction with formic acid.

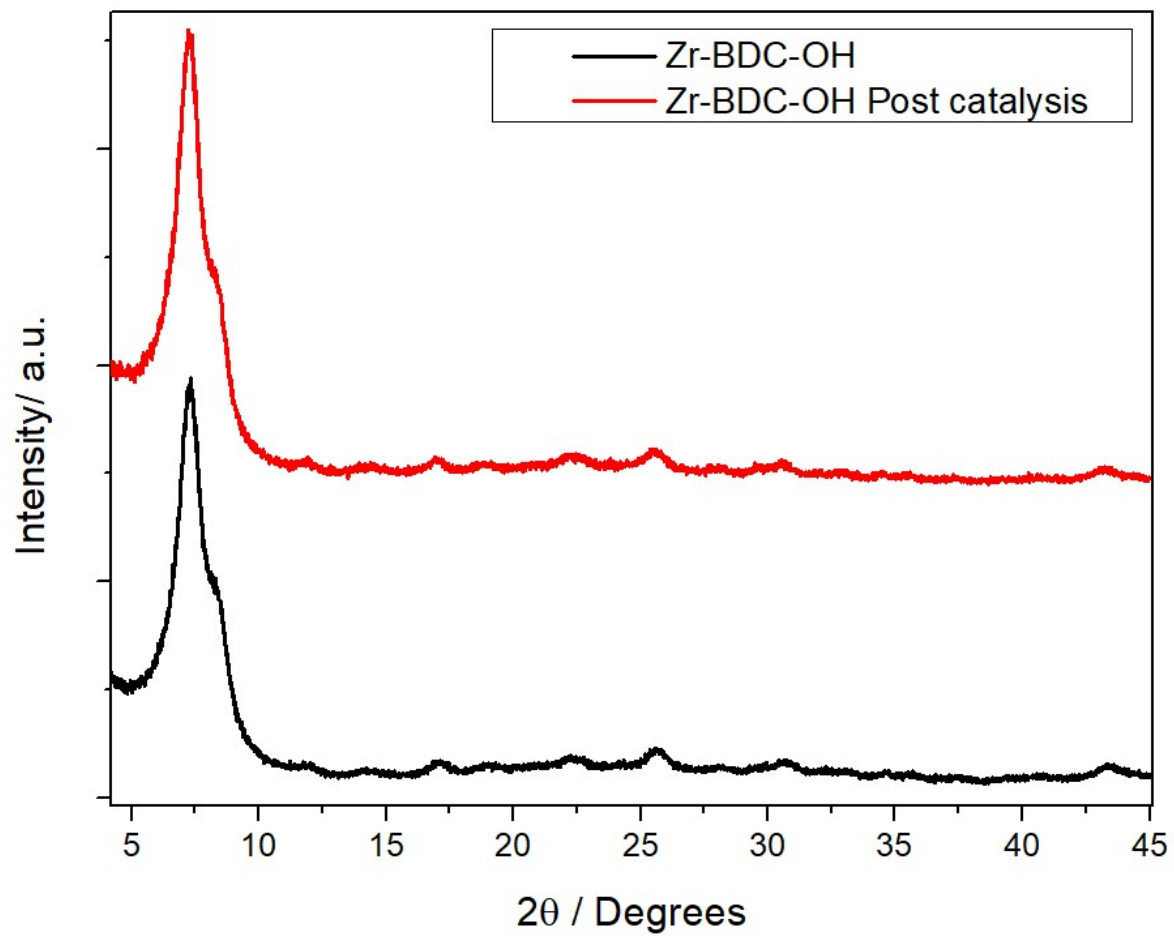

**Figure S44:** PXRD patterns of the ultra-small Zr-BDC-OH MOF before and after 10 minutes of catalytic reaction with formic acid.

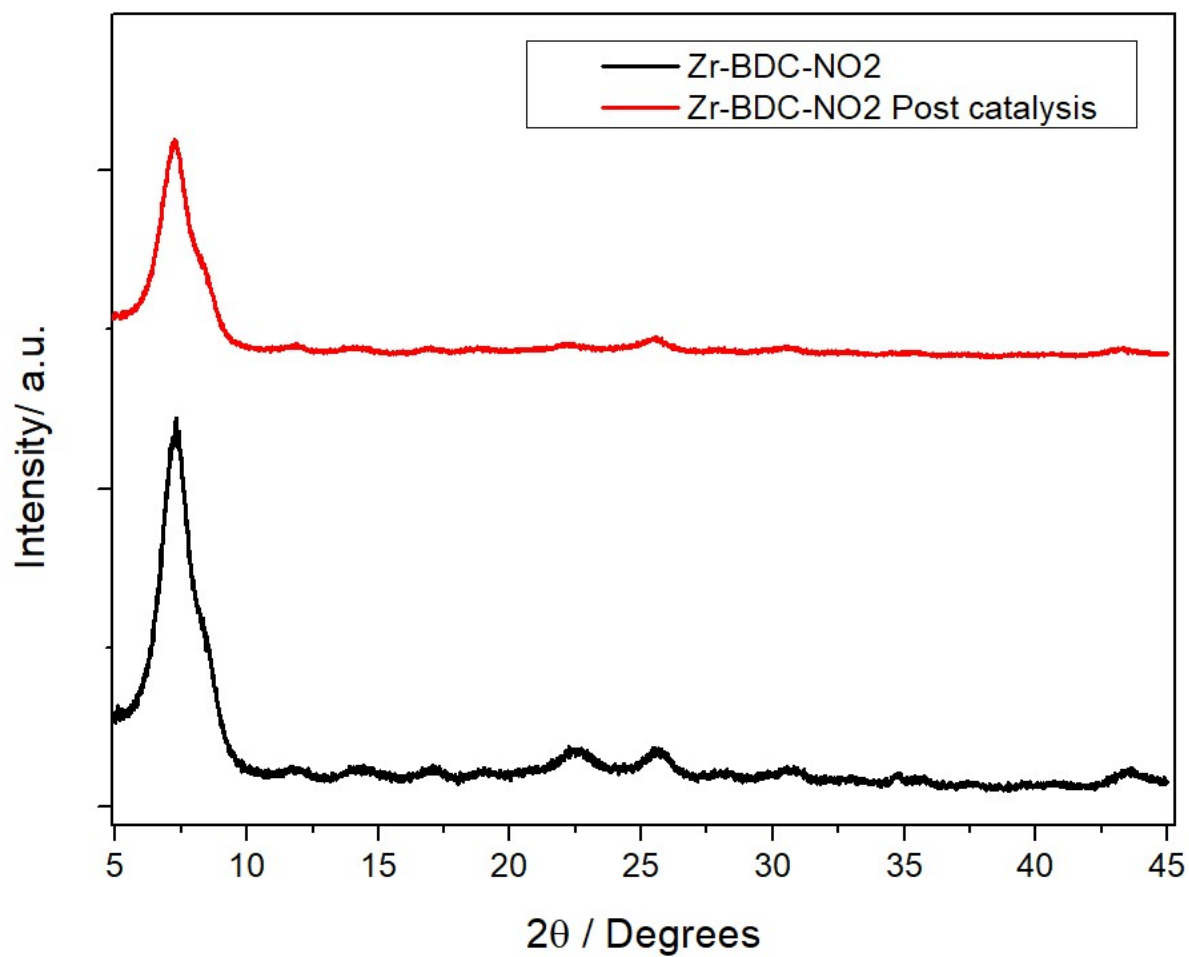

**Figure S45:** PXRD patterns of the ultra-small Zr-BDC-NO<sub>2</sub> MOF before and after the catalytic reaction.

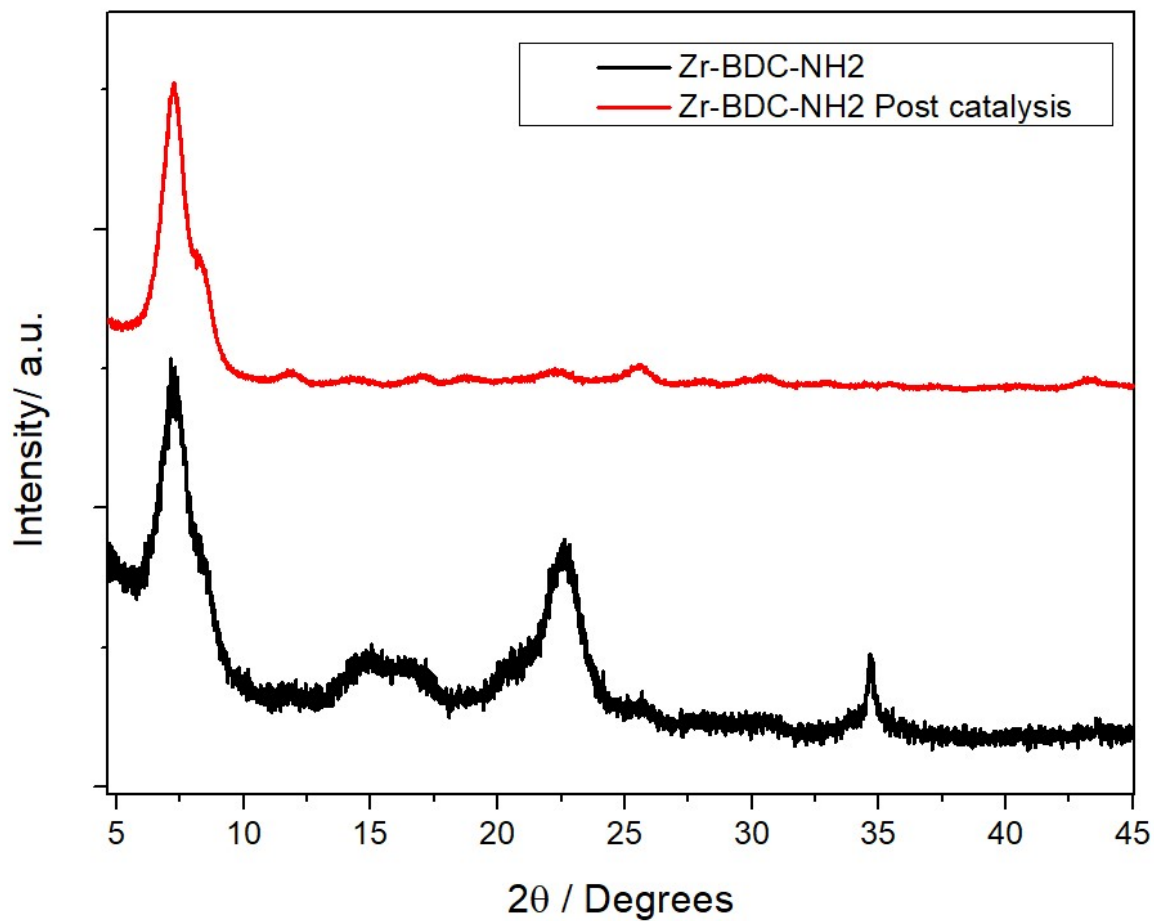

**Figure S46:** PXRD patterns of the ultra-small Zr-BDC-NH<sub>2</sub> MOF before and after the catalytic reaction.

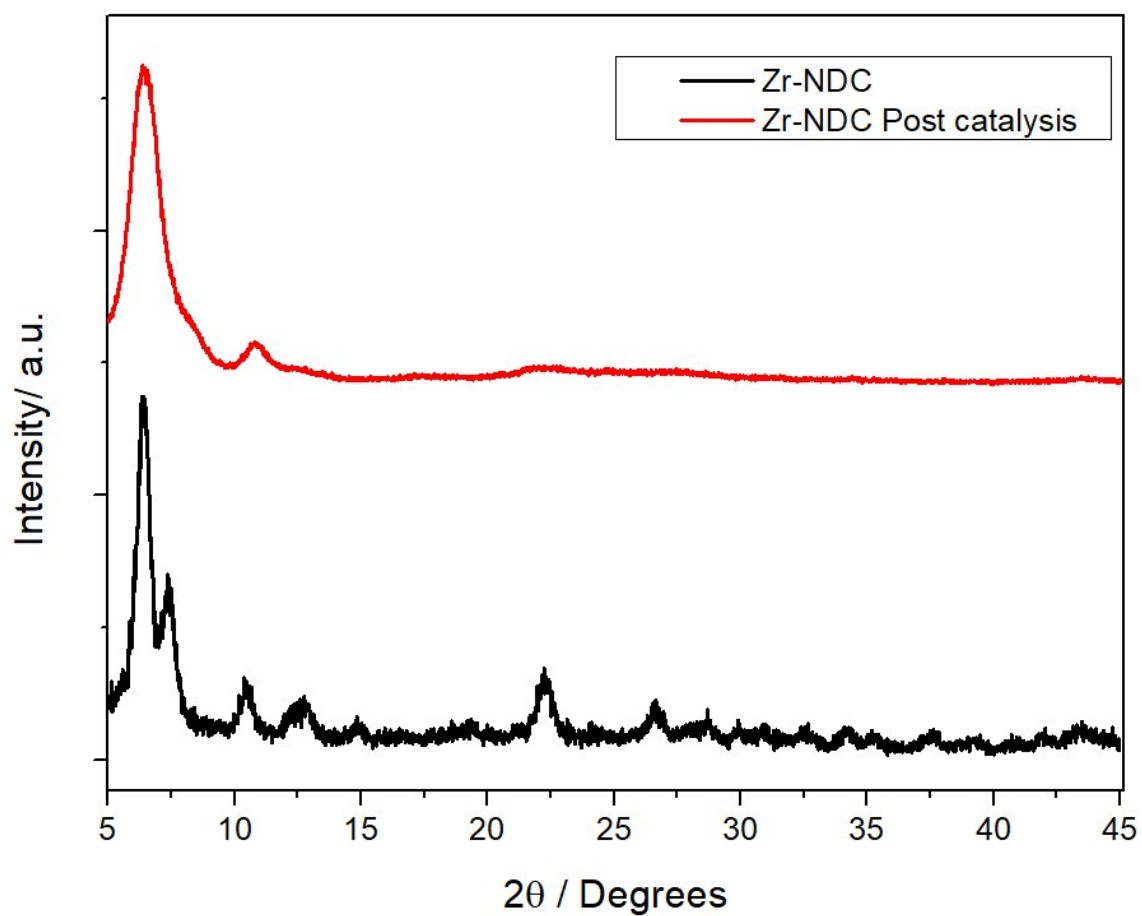

**Figure S47:** PXRD patterns of the ultra-small Zr-NDC MOF before and after the catalytic reaction.

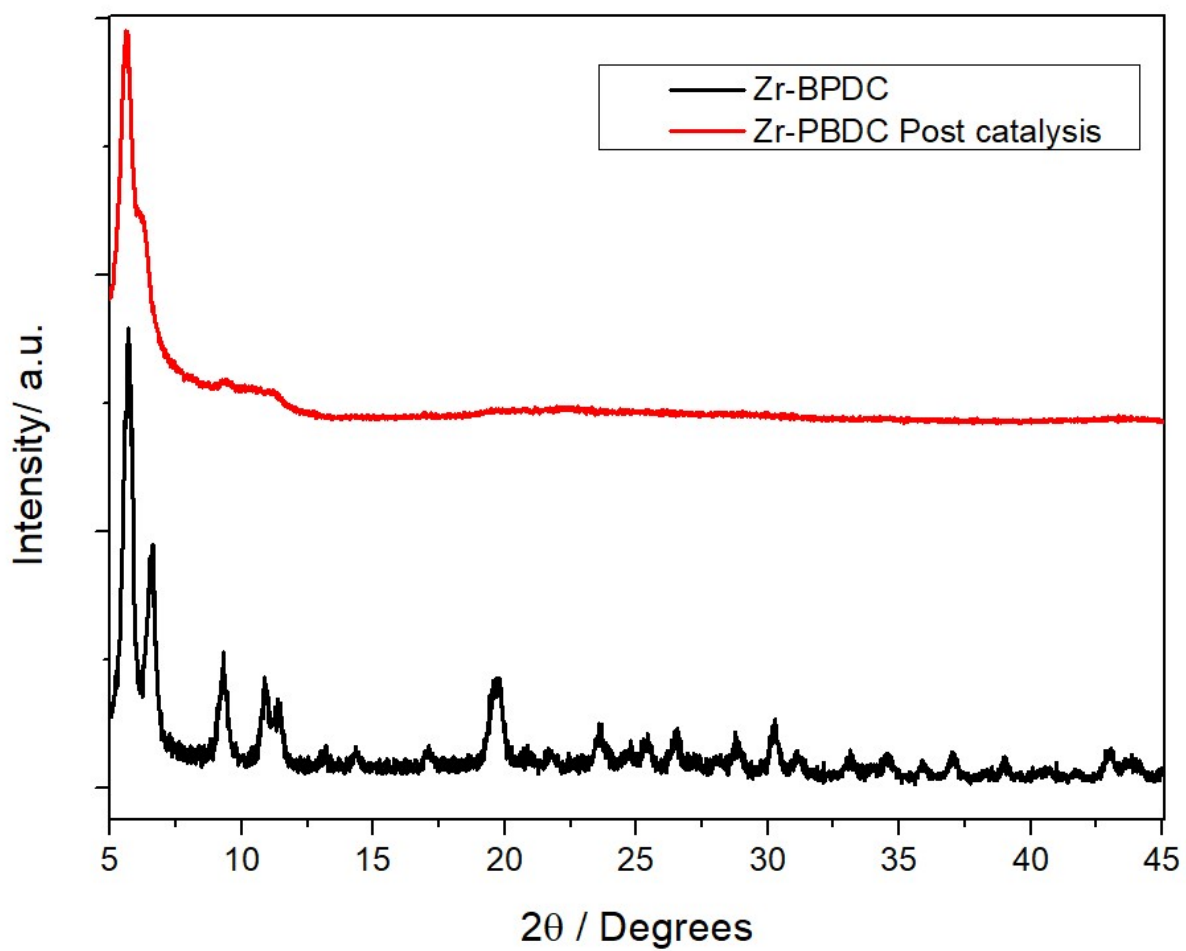

**Figure S48:** PXRD patterns of the ultra-small Zr-BPDC MOF before and after the catalytic reaction.

### Comparison of Zr-BDC-NH<sub>2</sub> ultra-small nanoparticles with standard Zr-BDC-NH<sub>2</sub>

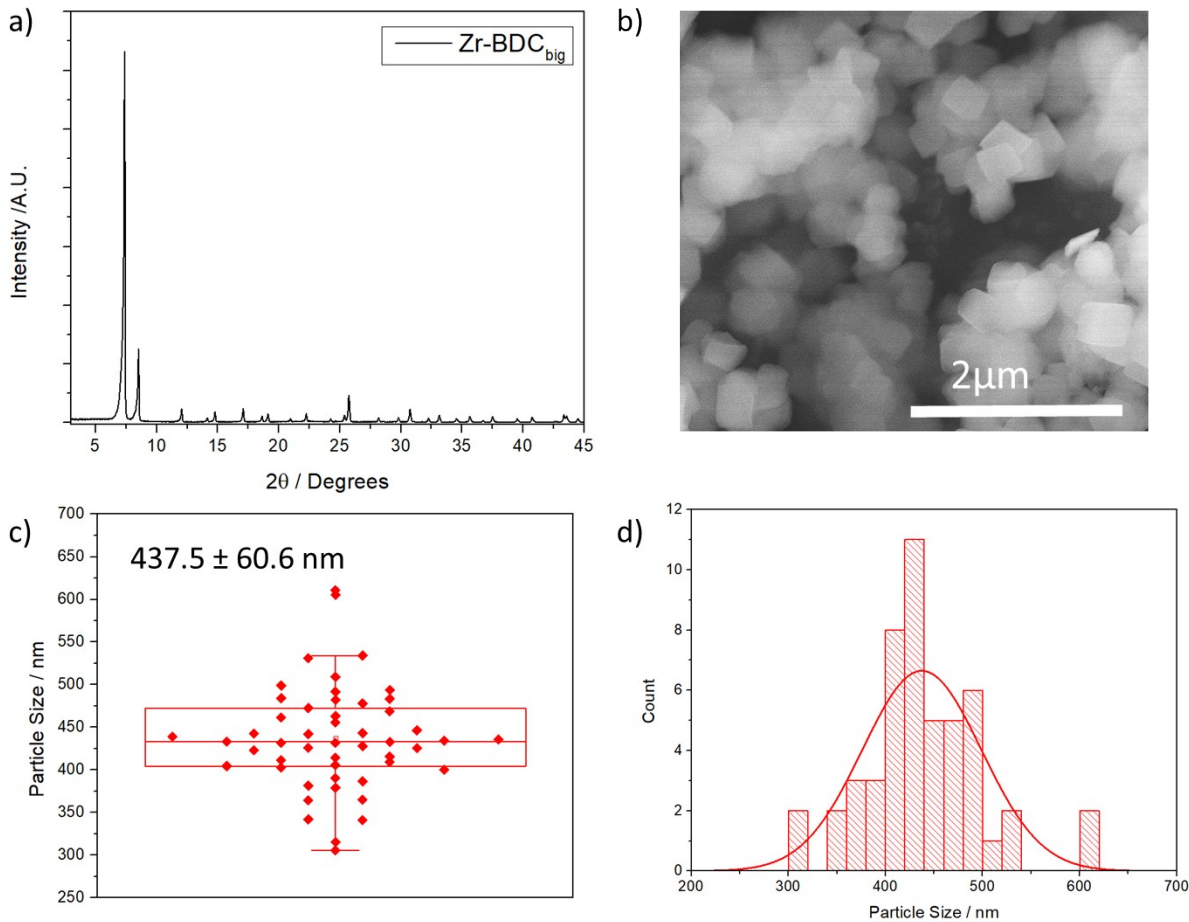

**Figure S49:** Characterisation of standard Zr-BDC-NH<sub>2</sub> of ca. 437.5 ± 60.6 nm. a) PXRD pattern, b) SEM image, c) box chart representation of particle sizes measured and d) histogram representation alongside distribution curve of the particle size.

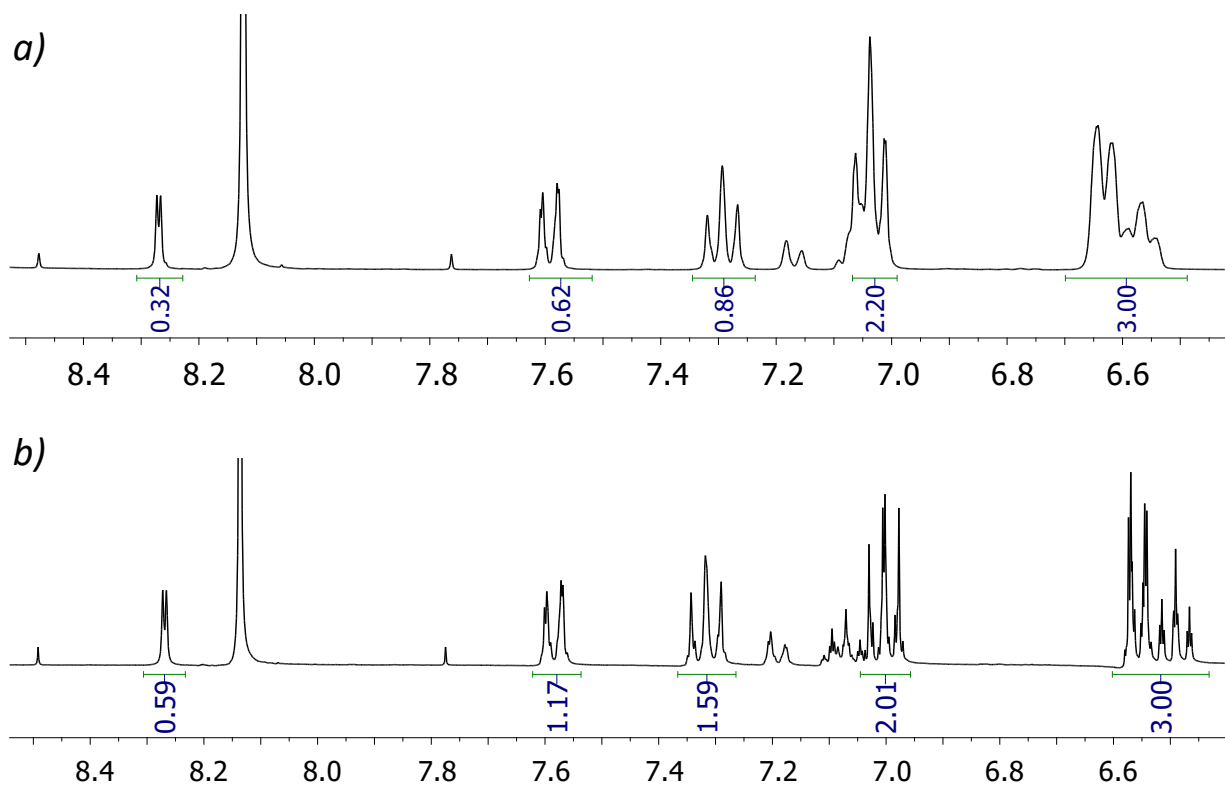

**Figure S50.** <sup>1</sup>H-NMR spectra (aromatic region) after 1 h of reaction between aniline and formic acid under solvent-free conditions in the presence of standard Zr-BDC-NH<sub>2</sub> (a) and ultra-small Zr-BDC-NH<sub>2</sub> nanoparticles (b). Reaction conditions: 5 eq. of acid, 10%wt. MOF, 35 °C.

**Table S9.** Activity (reaction yield after 1 h, see Fig. S41) of Zr-BDC-NH<sub>2</sub> nanoparticles and standard Zr-BDC-NH<sub>2</sub> in the solvent-free formylation of aniline at 35°C.

| Particle size                    | Yield/% |
|----------------------------------|---------|
| Standard Zr-BDC-NH <sub>2</sub>  | 22      |
| Nanosized Zr-BDC-NH <sub>2</sub> | 34      |



## Reaction between phenylacetic acid and benzylamine

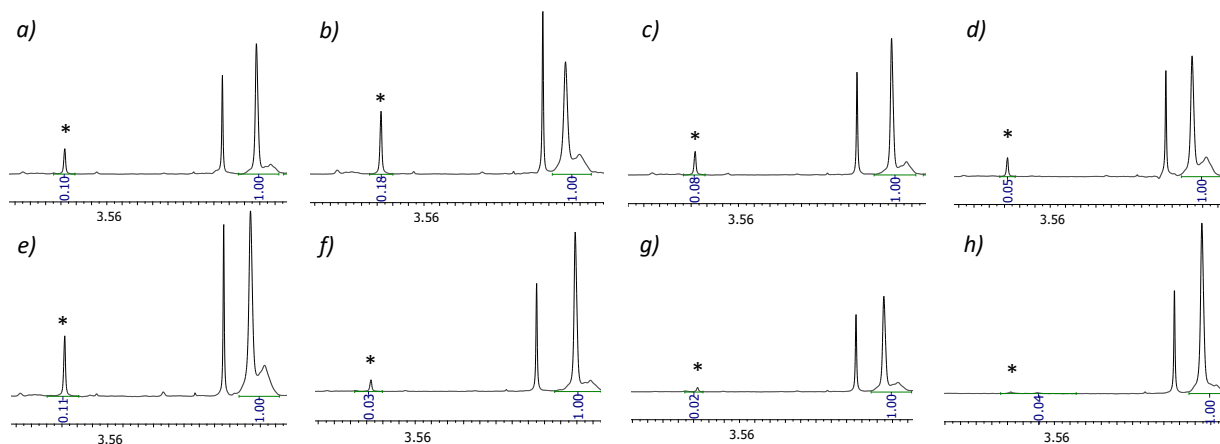

**Figure S51.**  $^1\text{H-NMR}$  spectra (methylene region) of reaction between benzylamine and phenylacetic acid in the presence of Zr-BDC (a), Zr-BDC- $\text{NO}_2$  (b), Zr-BDC- $\text{NH}_2$  (c), Zr-BDC-OH (d), Zr-NDC (e), Zr-BPDC (f),  $\text{ZrOCl}_2$  (g) and absence of MOF (h).

**Table S10.** Amidation of phenylacetic acid with benzylamine at  $60^\circ\text{C}$  for 24 h in  $\text{CD}_3\text{OD}$ .

| Composition           | Yield/% | $r_0/\mu\text{mol}\cdot\text{h}^{-1}$ |
|-----------------------|---------|---------------------------------------|
| Zr-BDC                | 9       | 0.56                                  |
| Zr-BDC- $\text{NO}_2$ | 15      | 0.94                                  |
| Zr-BDC- $\text{NH}_2$ | 7       | 0.44                                  |
| Zr-BDC-OH             | 5       | 0.31                                  |
| Zr-NDC                | 10      | 0.62                                  |
| Zr-BPDC               | 3       | 0.19                                  |
| $\text{ZrOCl}$        | 2       | 0.13                                  |
| Blank                 | 4       | 0.25                                  |

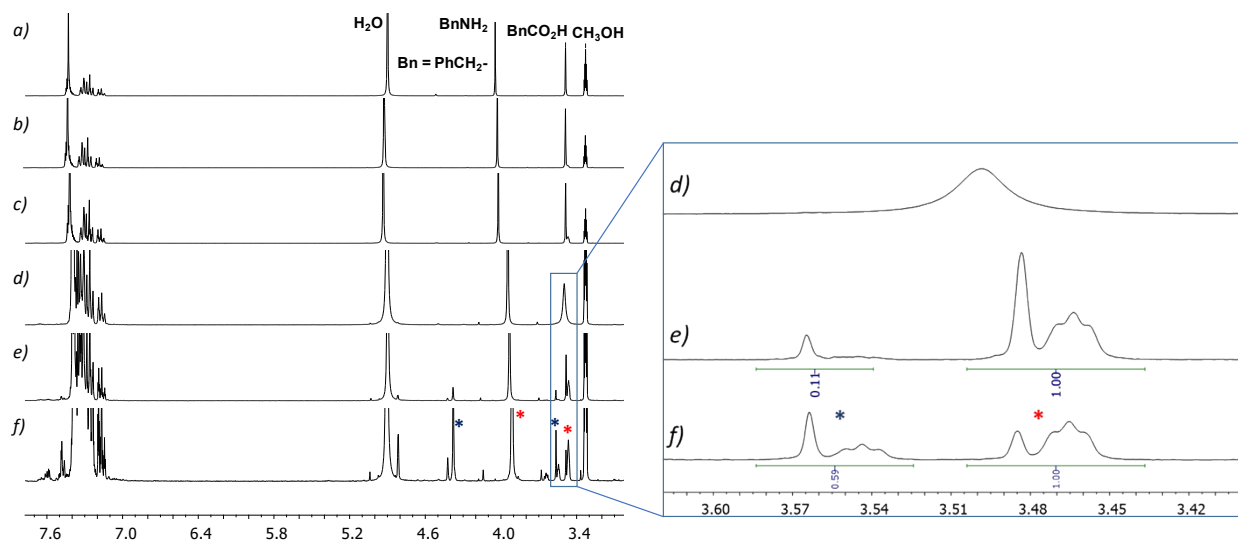

**Figure S52.**  $^1\text{H-NMR}$  (300 MHz,  $\text{CD}_3\text{OD}$ ) spectra ( $-\text{CH}_2-$  region of phenylacetic acid zoomed on the right part) after 1 h (a, d), 24 h (b, e), 72 h (c, f), of reaction between benzylamine (20  $\mu\text{L}$ ) and phenylacetic acid (20 mg) in  $\text{CD}_3\text{OD}$  at 60  $^\circ\text{C}$  in absence (a, b, c) or presence of Zr-NDC (10 mg). Phenylacetic acid (pure)  $\delta$  7.30 (m, 5H, Ar-H), 3.61 (s, 2H,  $\text{CH}_2$ ). Benzylamine (pure)  $\delta$  7.29 (m, 5H), 3.79 (s, 2H,  $\text{CH}_2$ ).  $-\text{CH}_2-$  in the reaction media: \*Phenylacetic acid ( $\delta$  3.48); \*Benzylamine ( $\delta$  3.97); \*N-benzyl-2-phenylacetamide ( $\delta$  4.40, 3.55).

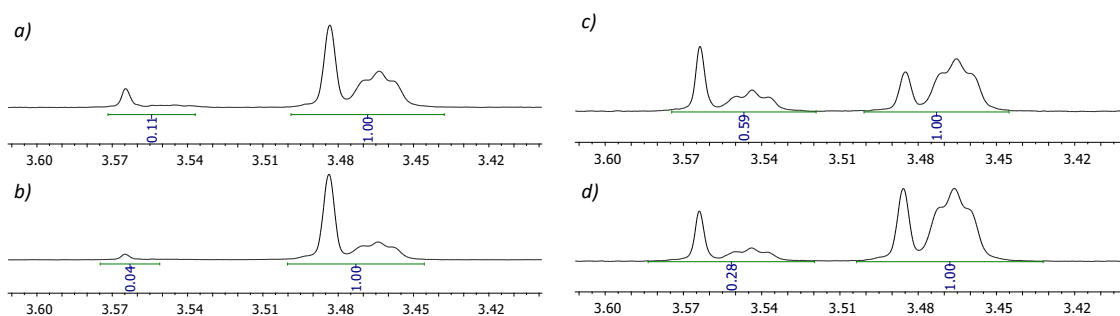

**Figure S53.**  $^1\text{H-NMR}$  spectra (methylene region) after 24 h of the 1<sup>st</sup> (a) and 2<sup>nd</sup> (b) runs, and 72 h of the 1<sup>st</sup> (c) and 2<sup>nd</sup> (d) runs between benzylamine (20  $\mu\text{L}$ ) and phenylacetic acid (20 mg) in  $\text{CD}_3\text{OD}$  at 60  $^\circ\text{C}$  in the presence of Zr-NDC (10 mg).

**Table S11.** Recyclability of Zr-NDC<sup>a</sup>

| Run | Time/ h | Yield |
|-----|---------|-------|
| 1   | 24      | 9     |
|     | 72      | 37    |
| 2   | 24      | 4     |
|     | 72      | 22    |

<sup>a</sup> 10 mg MOF Zr-NDC, benzylamine (20  $\mu\text{L}$ ), phenylacetic acid (20 mg),  $\text{CD}_3\text{OD}$  (200 $\mu\text{L}$ ) at 60  $^\circ\text{C}$ .

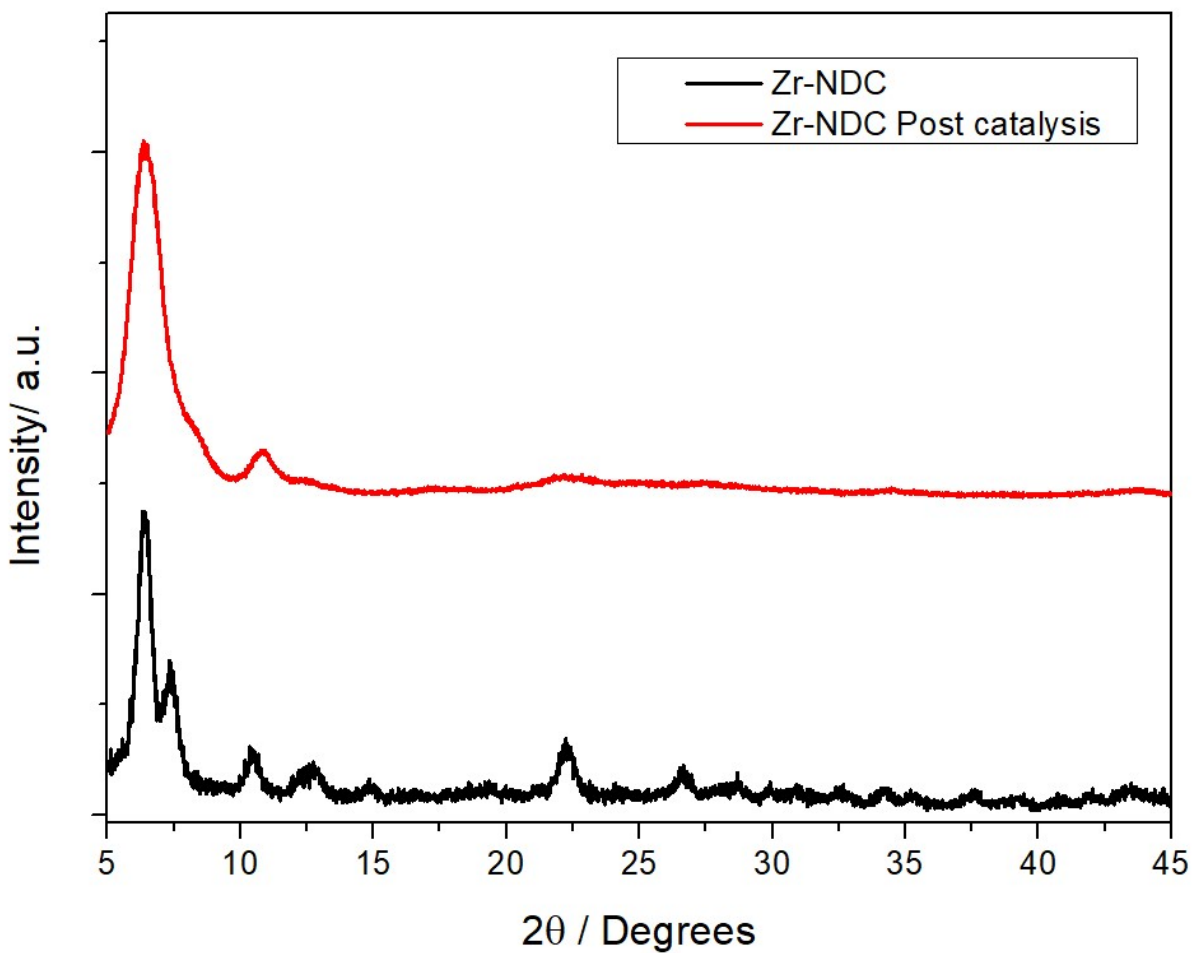

**Figure S54:** PXRD patterns of the ultra-small Zr-NDC MOF before and after the catalytic reaction between phenylacetic acid and benzylamine.

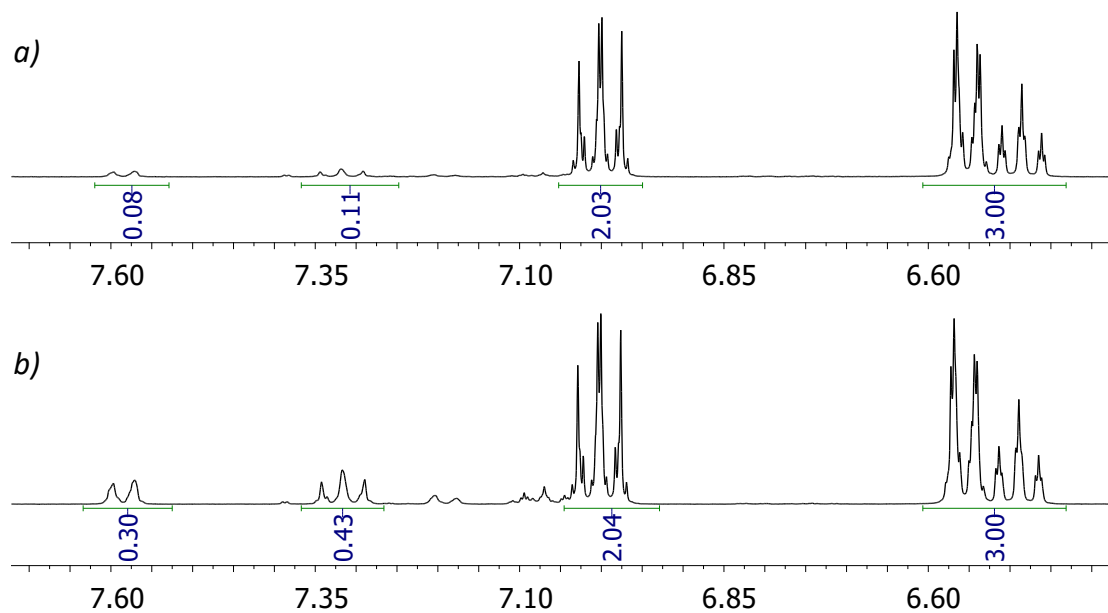

**Figure S55.** <sup>1</sup>H-NMR spectra (aromatic region) after 5 min (a) and 60 min (b) of reaction between aniline and formic acid in methanol-d as solvent in the presence of Zr-BDC-NH<sub>2</sub>. Reaction conditions: 5 eq. of acid, 10%wt. MOF, 35 °C.

**Table S12.** Kinetic study of the formylation of aniline (100 μL) with formic acid (200 μL) solvent-free or in methanol-d (100uL) at 35°C in the presence of Zr-BDC-NH<sub>2</sub> (10 mg).

| Time/h | Yield/%                       |                           |
|--------|-------------------------------|---------------------------|
|        | CD <sub>3</sub> OD as solvent | Solvent-free <sup>a</sup> |
| 0.08   | 4                             | 13                        |
| 1      | 12                            | 34                        |

<sup>a</sup> From Tables S6 and S7

## S.5. References

- 1 G. C. Shearer, S. Chavan, S. Bordiga, S. Svelle, U. Olsbye and K. P. Lillerud, *Chem. Mater.*, 2016, **28**, 3749–3761
- 2 I. A. Lázaro, *Eur. J. Inorg. Chem.* 2020, **2020**, 4284.
